# Supplementary material for: Characterizing 5-hydroxymethylcytosine in human prefrontal cortex at single base resolution
Source: PubMed Central journal article supplement (PMC4559220; doi:10.1186/s12864-015-1875-8), 2015-09-03
Supplement: 12864_2015_1875_MOESM1_ESM.pdf [file 12864_2015_1875_MOESM1_ESM.pdf]

Supplementary Table S1 - Sequencing quality control metrics

**MALES**

| Subject # | Total Sequencing Reads | Number of Bases from Sequencing | Average Quality Phred Score | Total Reads After Filtering | Unmapped     | Uniquely mapped | Mapped >1 time | % mapped | % Uniquely mapped | Total Mapped Reads Used | Total Reads Discarded | % Reads Used |
|-----------|------------------------|---------------------------------|-----------------------------|-----------------------------|--------------|-----------------|----------------|----------|-------------------|-------------------------|-----------------------|--------------|
| 1         | 136,425,815            | 6,821,290,750                   | 38                          | 126,528,050                 | 2,310,493    | 91,282,575      | 32,934,982     | 98.09%   | 72.14%            | 108,529,705             | 17,998,345            | 85.78%       |
| 2         | 75,824,476             | 3,791,223,800                   | 37                          | 70,082,708                  | 1,292,962    | 51,206,900      | 17,582,846     | 98.18%   | 73.07%            | 60,282,828              | 9,799,880             | 86.02%       |
| 3         | 109,746,078            | 5,487,303,900                   | 38                          | 101,002,320                 | 1,462,771    | 73,548,037      | 25,991,512     | 98.56%   | 72.82%            | 87,183,867              | 13,818,453            | 86.32%       |
| 4         | 84,572,609             | 4,228,630,450                   | 38                          | 78,194,636                  | 1,168,318    | 57,786,936      | 19,239,382     | 98.51%   | 73.90%            | 68,099,512              | 10,095,124            | 87.09%       |
| 5         | 89,383,168             | 4,469,158,400                   | 37                          | 82,702,245                  | 2,005,032    | 60,065,746      | 20,631,467     | 97.58%   | 72.63%            | 70,396,302              | 12,305,943            | 85.12%       |
| 6         | 121,047,850            | 6,052,392,500                   | 37                          | 111,988,680                 | 2,323,897    | 81,512,309      | 28,152,474     | 97.93%   | 72.79%            | 95,719,919              | 16,268,761            | 85.47%       |
| 7         | 213,428,878            | 10,671,443,900                  | 37                          | 197,945,345                 | 4,629,847    | 144,682,781     | 48,632,717     | 97.66%   | 73.09%            | 119,981,699             | 77,963,646            | 60.61%       |
| 8         | 95,119,554             | 4,755,977,700                   | 38                          | 88,135,532                  | 1,526,884    | 65,298,422      | 21,310,226     | 98.27%   | 74.09%            | 76,713,285              | 11,422,247            | 87.04%       |
| 9         | 111,309,001            | 5,565,450,050                   | 38                          | 102,956,130                 | 3,588,684    | 74,631,028      | 24,736,418     | 96.52%   | 72.49%            | 87,176,540              | 15,779,590            | 84.67%       |
| 10        | 108,084,545            | 5,404,227,250                   | 37                          | 99,995,726                  | 2,073,028    | 71,643,257      | 26,279,441     | 97.93%   | 71.65%            | 84,810,820              | 15,184,906            | 84.81%       |
| 11        | 82,324,742             | 4,116,237,100                   | 37                          | 75,522,284                  | 2,017,406    | 55,373,629      | 18,131,249     | 97.33%   | 73.32%            | 64,119,269              | 11,403,015            | 84.90%       |
| 12        | 80,214,840             | 4,010,742,000                   | 37                          | 73,915,123                  | 1,450,954    | 54,029,593      | 18,434,576     | 98.13%   | 73.10%            | 63,356,251              | 10,558,872            | 85.71%       |
| 13        | 87,360,096             | 4,368,004,800                   | 37                          | 78,673,513                  | 1,155,950    | 57,936,217      | 19,581,346     | 98.55%   | 73.64%            | 68,306,598              | 10,366,915            | 86.82%       |
| 14        | 82,368,412             | 4,118,420,600                   | 38                          | 76,481,727                  | 978,499      | 56,076,909      | 19,426,319     | 98.72%   | 73.32%            | 66,345,193              | 10,136,534            | 86.75%       |
| 15        | 69,657,797             | 3,482,889,850                   | 38                          | 63,983,839                  | 1,075,204    | 46,030,200      | 16,878,435     | 98.36%   | 71.94%            | 54,598,304              | 9,385,535             | 85.33%       |
| 16        | 144,127,403            | 7,206,370,150                   | 37                          | 131,907,308                 | 2,825,594    | 94,634,513      | 34,447,201     | 97.86%   | 71.74%            | 109,395,311             | 22,511,997            | 82.93%       |
| 17        | 184,968,494            | 9,248,424,700                   | 37                          | 164,060,507                 | 2,297,036    | 119,714,703     | 42,048,768     | 98.60%   | 72.97%            | 114,568,439             | 49,492,068            | 69.83%       |
| 18        | 95,793,335             | 4,789,666,750                   | 38                          | 88,767,704                  | 1,010,211    | 65,032,196      | 22,725,297     | 98.87%   | 73.26%            | 77,039,874              | 11,727,830            | 86.79%       |
| 19        | 106,741,748            | 5,337,087,400                   | 37                          | 98,307,417                  | 1,140,399    | 72,325,164      | 24,841,854     | 98.84%   | 73.57%            | 85,368,784              | 12,938,633            | 86.84%       |
| Mean      | 109,394,675.84         | 5,469,733,792.11                | 37.30                       | 100,586,883.89              | 1,912,272.05 | 73,305,848.16   | 25,368,763.68  | 98.13%   | 72.92%            | 82,210,131.58           | 18,376,752.32         | 83.62%       |

**FEMALES**

| Subject # | Total Sequencing Reads | Number of Bases from Sequencing | Average Quality Phred Score | Total Reads After Filtering | Unmapped     | Uniquely mapped | Mapped >1 time | % mapped | % Uniquely mapped | Total Mapped Reads Used | Total Reads Discarded | % Reads Used |
|-----------|------------------------|---------------------------------|-----------------------------|-----------------------------|--------------|-----------------|----------------|----------|-------------------|-------------------------|-----------------------|--------------|
| 1         | 80,909,825             | 4,045,491,250                   | 38                          | 74,577,671                  | 1,157,379    | 54,076,828      | 19,343,464     | 98.45%   | 72.51%            | 64,226,058              | 10,351,613            | 86.12%       |
| 2         | 91,406,229             | 4,570,311,450                   | 38                          | 84,218,190                  | 1,354,303    | 60,935,424      | 21,928,463     | 98.40%   | 72.35%            | 72,300,054              | 11,918,136            | 85.85%       |
| 3         | 102,567,869            | 5,128,393,450                   | 37                          | 94,703,474                  | 1,127,697    | 69,445,947      | 24,129,830     | 98.81%   | 73.33%            | 82,237,690              | 12,465,784            | 86.84%       |
| 4         | 85,529,099             | 4,276,454,950                   | 38                          | 78,743,874                  | 1,337,734    | 57,515,830      | 19,890,310     | 98.30%   | 73.04%            | 67,964,503              | 10,779,371            | 86.31%       |
| 5         | 87,133,194             | 4,356,659,700                   | 38                          | 80,353,815                  | 1,382,176    | 58,744,264      | 20,227,375     | 98.28%   | 73.11%            | 69,107,852              | 11,245,963            | 86.00%       |
| Mean      | 89,509,243.20          | 4,475,462,160.00                | 37.80                       | 82,519,404.80               | 1,271,857.80 | 60,143,658.60   | 21,103,888.40  | 98.45%   | 72.87%            | 71,167,231.40           | 11,352,173.40         | 86.22%       |
