# Supplementary material for: Characterizing 5-hydroxymethylcytosine in human prefrontal cortex at single base resolution
Source: PubMed Central journal article supplement (PMC4559220; doi:10.1186/s12864-015-1875-8), 2015-09-03
Supplement: 12864_2015_1875_MOESM3_ESM.pdf [file 12864_2015_1875_MOESM3_ESM.pdf]

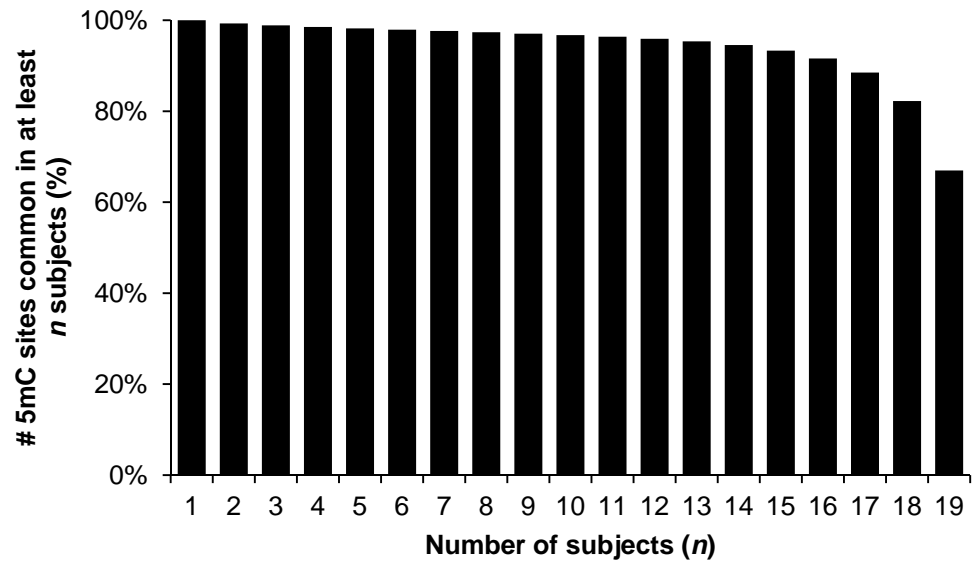

Supplementary figure-S2 (Turecki)
