# Supplementary material for: Characterizing 5-hydroxymethylcytosine in human prefrontal cortex at single base resolution
Source: PubMed Central journal article supplement (PMC4559220; doi:10.1186/s12864-015-1875-8), 2015-09-03
Supplement: 12864_2015_1875_MOESM5_ESM.pdf [file 12864_2015_1875_MOESM5_ESM.pdf]

Supplementary Table S2 - Cluster analysis in intermediate stringency

| GO Terms                                                        | expected | observed | p-value (fdr) | enrichment |
|-----------------------------------------------------------------|----------|----------|---------------|------------|
| protein binding                                                 | 4123.66  | 4506     | 1.44E-29      | up         |
| cytoplasm                                                       | 3853.46  | 4179     | 1.49E-21      | up         |
| binding                                                         | 6163.54  | 6451     | 5.84E-20      | up         |
| signaling                                                       | 1821.94  | 2063     | 1.22E-17      | up         |
| cellular process                                                | 5814.94  | 6086     | 1.52E-16      | up         |
| protein modification process                                    | 899.993  | 1074     | 1.56E-16      | up         |
| signaling pathway                                               | 1302.43  | 1506     | 1.82E-16      | up         |
| cellular protein metabolic process                              | 1240.23  | 1438     | 3.34E-16      | up         |
| post-translational protein modification                         | 768.287  | 928      | 3.95E-16      | up         |
| regulation of signaling pathway                                 | 516.895  | 648      | 9.85E-16      | up         |
| phosphorus metabolic process                                    | 658.009  | 804      | 1.39E-15      | up         |
| phosphate metabolic process                                     | 658.009  | 804      | 1.39E-15      | up         |
| macromolecule modification                                      | 941.282  | 1109     | 7.44E-15      | up         |
| signaling process                                               | 1318.63  | 1511     | 1.22E-14      | up         |
| signal transmission                                             | 1315.5   | 1507     | 1.50E-14      | up         |
| signal transduction                                             | 1140.93  | 1320     | 2.38E-14      | up         |
| positive regulation of biological process                       | 1144.07  | 1317     | 2.47E-13      | up         |
| phosphorylation                                                 | 575.431  | 702      | 2.66E-13      | up         |
| regulation of cell communication                                | 593.724  | 722      | 2.77E-13      | up         |
| intracellular signaling pathway                                 | 777.694  | 922      | 4.03E-13      | up         |
| protein amino acid phosphorylation                              | 413.411  | 520      | 5.84E-13      | up         |
| cytoplasmic part                                                | 2611.65  | 2841     | 8.95E-13      | up         |
| protein metabolic process                                       | 1473.33  | 1659     | 1.56E-12      | up         |
| positive regulation of cellular process                         | 1041.63  | 1202     | 1.63E-12      | up         |
| intracellular                                                   | 5646.12  | 5879     | 4.27E-12      | up         |
| intracellular part                                              | 5477.31  | 5708     | 1.37E-11      | up         |
| regulation of biological process                                | 3299.97  | 3526     | 4.78E-11      | up         |
| death                                                           | 634.49   | 755      | 5.07E-11      | up         |
| cell death                                                      | 632.922  | 753      | 5.63E-11      | up         |
| regulation of cellular process                                  | 3136.39  | 3356     | 1.15E-10      | up         |
| regulation of signaling process                                 | 399.823  | 495      | 1.17E-10      | up         |
| localization                                                    | 1699.12  | 1880     | 1.17E-10      | up         |
| regulation of signal transduction                               | 397.21   | 492      | 1.19E-10      | up         |
| Golgi apparatus                                                 | 451.042  | 551      | 1.73E-10      | up         |
| purine nucleoside binding                                       | 814.28   | 945      | 2.35E-10      | up         |
| biological regulation                                           | 3500.67  | 3721     | 2.48E-10      | up         |
| protein localization                                            | 531.006  | 638      | 2.61E-10      | up         |
| cell communication                                              | 858.704  | 992      | 2.74E-10      | up         |
| negative regulation of biological process                       | 1055.22  | 1201     | 2.86E-10      | up         |
| programmed cell death                                           | 578.044  | 689      | 2.92E-10      | up         |
| nucleotide binding                                              | 1127.87  | 1277     | 3.68E-10      | up         |
| nucleoside binding                                              | 819.506  | 949      | 3.75E-10      | up         |
| intracellular signal transduction                               | 617.243  | 730      | 5.59E-10      | up         |
| macromolecule localization                                      | 637.103  | 751      | 6.86E-10      | up         |
| catalytic activity                                              | 2604.86  | 2805     | 7.75E-10      | up         |
| purine nucleotide binding                                       | 966.892  | 1103     | 1.08E-09      | up         |
| apoptosis                                                       | 573.863  | 681      | 1.17E-09      | up         |
| negative regulation of cellular process                         | 966.369  | 1102     | 1.22E-09      | up         |
| adenyl nucleotide binding                                       | 795.987  | 920      | 1.38E-09      | up         |
| ribonucleotide binding                                          | 926.125  | 1056     | 3.52E-09      | up         |
| purine ribonucleotide binding                                   | 926.125  | 1056     | 3.52E-09      | up         |
| adenyl ribonucleotide binding                                   | 756.266  | 874      | 4.76E-09      | up         |
| cellular metabolic process                                      | 3712.34  | 3919     | 5.23E-09      | up         |
| ATP binding                                                     | 744.245  | 860      | 7.00E-09      | up         |
| regulation of phosphate metabolic process                       | 282.228  | 355      | 8.19E-09      | up         |
| regulation of phosphorus metabolic process                      | 282.228  | 355      | 8.19E-09      | up         |
| establishment of protein localization                           | 458.359  | 550      | 9.28E-09      | up         |
| regulation of phosphorylation                                   | 271.252  | 342      | 1.16E-08      | up         |
| developmental process                                           | 1748.24  | 1912     | 1.16E-08      | up         |
| system development                                              | 1318.63  | 1463     | 2.08E-08      | up         |
| phosphotransferase activity, alcohol group as acceptor          | 363.76   | 444      | 2.20E-08      | up         |
| cellular component organization                                 | 1417.41  | 1565     | 2.72E-08      | up         |
| primary metabolic process                                       | 3813.21  | 4011     | 3.04E-08      | up         |
| Golgi apparatus part                                            | 273.866  | 343      | 3.23E-08      | up         |
| protein transport                                               | 450.519  | 538      | 3.83E-08      | up         |
| Golgi membrane                                                  | 227.35   | 290      | 4.19E-08      | up         |
| anatomical structure development                                | 1460.79  | 1608     | 4.39E-08      | up         |
| establishment of localization                                   | 1468.11  | 1615     | 5.09E-08      | up         |
| transport                                                       | 1449.81  | 1595     | 6.47E-08      | up         |
| multicellular organismal development                            | 1593.54  | 1744     | 6.81E-08      | up         |
| intracellular protein kinase cascade                            | 304.702  | 375      | 1.12E-07      | up         |
| signal transmission via phosphorylation event                   | 304.702  | 375      | 1.12E-07      | up         |
| kinase activity                                                 | 393.551  | 473      | 1.13E-07      | up         |
| cellular localization                                           | 613.062  | 711      | 1.13E-07      | up         |
| regulation of cell death                                        | 460.972  | 546      | 1.47E-07      | up         |
| regulation of programmed cell death                             | 457.314  | 542      | 1.47E-07      | up         |
| transferase activity, transferring phosphorus-containing groups | 454.7    | 539      | 1.55E-07      | up         |
| nervous system development                                      | 603.131  | 699      | 1.78E-07      | up         |
| regulation of developmental process                             | 413.934  | 494      | 1.94E-07      | up         |
| cell surface receptor linked signaling pathway                  | 768.287  | 875      | 1.99E-07      | up         |
| endomembrane system                                             | 735.883  | 840      | 2.36E-07      | up         |
| positive regulation of developmental process                    | 182.925  | 236      | 3.04E-07      | up         |
| enzyme linked receptor protein signaling pathway                | 244.075  | 305      | 3.46E-07      | up         |
| metabolic process                                               | 4182.2   | 4367     | 3.62E-07      | up         |

|                                                                                              |         |      |             |    |
|----------------------------------------------------------------------------------------------|---------|------|-------------|----|
| regulation of apoptosis                                                                      | 453.132 | 535  | 3.76E-07    | up |
| intracellular membrane-bounded organelle                                                     | 4179.58 | 4364 | 3.80E-07    | up |
| membrane-bounded organelle                                                                   | 4183.24 | 4367 | 4.25E-07    | up |
| organelle                                                                                    | 4670.35 | 4852 | 5.83E-07    | up |
| regulation of small GTPase mediated signal transduction                                      | 135.365 | 180  | 6.35E-07    | up |
| intracellular organelle                                                                      | 4663.03 | 4844 | 6.49E-07    | up |
| transmembrane receptor protein tyrosine kinase signaling pathway                             | 152.089 | 199  | 8.22E-07    | up |
| cellular developmental process                                                               | 985.184 | 1099 | 8.40E-07    | up |
| cell proliferation                                                                           | 594.769 | 684  | 1.35E-06    | up |
| anatomical structure morphogenesis                                                           | 716.022 | 813  | 1.43E-06    | up |
| positive regulation of cell differentiation                                                  | 133.797 | 177  | 1.45E-06    | up |
| response to organic substance                                                                | 456.268 | 534  | 2.01E-06    | up |
| regulation of transferase activity                                                           | 208.012 | 261  | 2.22E-06    | up |
| protein kinase activity                                                                      | 305.224 | 369  | 2.32E-06    | up |
| growth                                                                                       | 275.433 | 336  | 2.41E-06    | up |
| regulation of kinase activity                                                                | 200.173 | 252  | 2.41E-06    | up |
| cell differentiation                                                                         | 938.669 | 1046 | 2.47E-06    | up |
| positive regulation of cell death                                                            | 242.507 | 299  | 2.97E-06    | up |
| positive regulation of metabolic process                                                     | 538.323 | 621  | 3.06E-06    | up |
| positive regulation of programmed cell death                                                 | 239.894 | 296  | 3.06E-06    | up |
| positive regulation of cellular metabolic process                                            | 511.669 | 592  | 3.49E-06    | up |
| positive regulation of macromolecule metabolic process                                       | 499.648 | 579  | 3.57E-06    | up |
| regulation of cell proliferation                                                             | 435.885 | 510  | 3.91E-06    | up |
| cell projection                                                                              | 392.506 | 463  | 3.91E-06    | up |
| cellular macromolecule metabolic process                                                     | 2842.14 | 3001 | 4.32E-06    | up |
| cellular response to stimulus                                                                | 558.184 | 641  | 4.47E-06    | up |
| establishment of localization in cell                                                        | 566.024 | 649  | 5.05E-06    | up |
| cell development                                                                             | 414.457 | 486  | 5.22E-06    | up |
| positive regulation of apoptosis                                                             | 238.326 | 293  | 5.47E-06    | up |
| regulation of protein kinase activity                                                        | 192.856 | 242  | 5.90E-06    | up |
| enzyme binding                                                                               | 326.653 | 390  | 6.33E-06    | up |
| neurogenesis                                                                                 | 332.402 | 396  | 7.11E-06    | up |
| nucleoside-triphosphatase regulator activity                                                 | 215.852 | 267  | 8.78E-06    | up |
| ossification                                                                                 | 95.1212 | 129  | 1.02E-05    | up |
| regulation of protein metabolic process                                                      | 332.402 | 395  | 1.07E-05    | up |
| intracellular transport                                                                      | 379.44  | 446  | 1.12E-05    | up |
| regulation of multicellular organismal process                                               | 554.525 | 634  | 1.17E-05    | up |
| cellular protein localization                                                                | 256.096 | 311  | 1.19E-05    | up |
| cellular macromolecule localization                                                          | 257.141 | 312  | 1.27E-05    | up |
| response to chemical stimulus                                                                | 762.015 | 853  | 1.52E-05    | up |
| urogenital system development                                                                | 76.306  | 106  | 1.72E-05    | up |
| neuron projection                                                                            | 190.242 | 237  | 1.74E-05    | up |
| positive regulation of signaling pathway                                                     | 197.559 | 245  | 1.91E-05    | up |
| positive regulation of nucleobase, nucleoside, nucleotide and nucleic acid metabolic process | 349.126 | 411  | 2.50E-05    | up |
| regulation of cellular protein metabolic process                                             | 294.249 | 351  | 2.73E-05    | up |
| regulation of molecular function                                                             | 547.731 | 624  | 2.73E-05    | up |
| kidney development                                                                           | 55.4003 | 80   | 3.27E-05    | up |
| MAPKKK cascade                                                                               | 153.135 | 194  | 3.36E-05    | up |
| GTPase regulator activity                                                                    | 211.148 | 259  | 3.36E-05    | up |
| heart development                                                                            | 125.957 | 163  | 3.47E-05    | up |
| transferase activity                                                                         | 856.614 | 949  | 3.54E-05    | up |
| positive regulation of transcription                                                         | 306.792 | 364  | 3.54E-05    | up |
| vesicle                                                                                      | 365.851 | 428  | 3.64E-05    | up |
| positive regulation of nitrogen compound metabolic process                                   | 359.579 | 421  | 3.94E-05    | up |
| cellular response to organic substance                                                       | 138.501 | 177  | 4.11E-05    | up |
| camera-type eye morphogenesis                                                                | 27.1775 | 44   | 4.12E-05    | up |
| organelle part                                                                               | 2560.96 | 2701 | 4.26E-05    | up |
| generation of neurons                                                                        | 309.405 | 366  | 4.80E-05    | up |
| positive regulation of kinase activity                                                       | 126.48  | 163  | 4.81E-05    | up |
| organelle organization                                                                       | 753.13  | 839  | 4.81E-05    | up |
| cell projection organization                                                                 | 237.28  | 287  | 4.82E-05    | up |
| small GTPase mediated signal transduction                                                    | 221.078 | 269  | 5.07E-05    | up |
| macromolecule metabolic process                                                              | 3130.12 | 3276 | 5.27E-05    | up |
| positive regulation of gene expression                                                       | 323.517 | 381  | 5.32E-05    | up |
| regulation of protein amino acid phosphorylation                                             | 117.072 | 152  | 5.38E-05    | up |
| positive regulation of molecular function                                                    | 331.879 | 390  | 5.41E-05    | up |
| positive regulation of transferase activity                                                  | 131.184 | 168  | 5.81E-05    | up |
| positive regulation of cellular biosynthetic process                                         | 382.053 | 444  | 5.82E-05    | up |
| negative regulation of cell proliferation                                                    | 198.082 | 243  | 6.30E-05    | up |
| regulation of growth                                                                         | 189.197 | 233  | 6.66E-05    | up |
| renal system development                                                                     | 56.9682 | 81   | 7.07E-05    | up |
| protein serine/threonine kinase activity                                                     | 217.42  | 264  | 7.64E-05    | up |
| organelle membrane                                                                           | 953.826 | 1047 | 7.65E-05    | up |
| cell morphogenesis involved in differentiation                                               | 157.316 | 197  | 7.80E-05    | up |
| intracellular organelle part                                                                 | 2524.89 | 2660 | 7.81E-05    | up |
| positive regulation of cell communication                                                    | 214.807 | 261  | 7.85E-05    | up |
| cell morphogenesis                                                                           | 222.124 | 269  | 8.10E-05    | up |
| positive regulation of biosynthetic process                                                  | 387.802 | 449  | 8.46E-05    | up |
| organ development                                                                            | 991.979 | 1086 | 8.80E-05    | up |
| neuron differentiation                                                                       | 281.183 | 333  | 0.000109238 | up |
| positive regulation of protein kinase activity                                               | 121.776 | 156  | 0.00012158  | up |
| regulation of Ras protein signal transduction                                                | 116.55  | 150  | 0.000123982 | up |
| vasculature development                                                                      | 178.744 | 220  | 0.00012546  | up |
| cytosol                                                                                      | 669.507 | 747  | 0.00012546  | up |
| cellular component morphogenesis                                                             | 244.075 | 292  | 0.000130696 | up |
| transcription repressor activity                                                             | 173.518 | 214  | 0.000135712 | up |

|                                                             |         |      |             |    |
|-------------------------------------------------------------|---------|------|-------------|----|
| eye morphogenesis                                           | 42.8568 | 63   | 0.000135712 | up |
| microspike assembly                                         | 12.5435 | 23   | 0.000137126 | up |
| cytoplasmic vesicle                                         | 350.172 | 407  | 0.000138365 | up |
| cytoskeletal protein binding                                | 257.141 | 306  | 0.000144679 | up |
| blood vessel development                                    | 174.563 | 215  | 0.000144994 | up |
| small GTPase regulator activity                             | 144.25  | 181  | 0.000150051 | up |
| neuron development                                          | 205.399 | 249  | 0.000157004 | up |
| regulation of ossification                                  | 45.47   | 66   | 0.000167015 | up |
| regulation of biological quality                            | 871.248 | 957  | 0.000170594 | up |
| regulation of cell differentiation                          | 289.022 | 340  | 0.000188205 | up |
| actin cytoskeleton organization                             | 142.159 | 178  | 0.00021271  | up |
| regulation of anatomical structure morphogenesis            | 160.974 | 199  | 0.000220252 | up |
| filopodium assembly                                         | 12.0208 | 22   | 0.00023847  | up |
| positive regulation of macromolecule biosynthetic process   | 360.102 | 416  | 0.000242185 | up |
| cell junction                                               | 275.956 | 325  | 0.000255717 | up |
| Ras protein signal transduction                             | 118.64  | 151  | 0.000270148 | up |
| adherens junction                                           | 75.2608 | 101  | 0.000283557 | up |
| cellular catabolic process                                  | 504.352 | 569  | 0.000311281 | up |
| bone development                                            | 104.006 | 134  | 0.000328693 | up |
| regulation of catalytic activity                            | 464.108 | 526  | 0.000336536 | up |
| mesenchyme development                                      | 42.8568 | 62   | 0.000361302 | up |
| cellular response to endogenous stimulus                    | 97.2118 | 126  | 0.000374088 | up |
| basolateral plasma membrane                                 | 116.55  | 148  | 0.000382079 | up |
| actin filament-based process                                | 150.522 | 186  | 0.000419088 | up |
| forebrain development                                       | 90.4174 | 118  | 0.000419088 | up |
| regulation of cellular component organization               | 279.092 | 327  | 0.000419088 | up |
| positive regulation of multicellular organismal process     | 144.25  | 179  | 0.000419088 | up |
| small molecule metabolic process                            | 857.136 | 938  | 0.000422953 | up |
| membrane-bounded vesicle                                    | 341.287 | 394  | 0.000423755 | up |
| regulation of intracellular protein kinase cascade          | 170.382 | 208  | 0.000428307 | up |
| vesicle-mediated transport                                  | 342.332 | 395  | 0.000438612 | up |
| phosphoinositide binding                                    | 58.0135 | 80   | 0.000453581 | up |
| cellular component movement                                 | 335.015 | 387  | 0.000457244 | up |
| negative regulation of cell death                           | 213.239 | 255  | 0.000462306 | up |
| positive regulation of signaling process                    | 146.34  | 181  | 0.000480749 | up |
| Wnt receptor signaling pathway                              | 97.7344 | 126  | 0.00052185  | up |
| negative regulation of cell cycle                           | 97.7344 | 126  | 0.00052185  | up |
| blood vessel morphogenesis                                  | 151.044 | 186  | 0.00054053  | up |
| intracellular protein transport                             | 223.692 | 266  | 0.000546542 | up |
| cell projection part                                        | 184.493 | 223  | 0.000547474 | up |
| nuclear envelope                                            | 118.118 | 149  | 0.000563336 | up |
| cell migration                                              | 236.758 | 280  | 0.000598546 | up |
| transcription factor binding                                | 269.162 | 315  | 0.000636075 | up |
| cellular response to chemical stimulus                      | 230.486 | 273  | 0.000636075 | up |
| negative regulation of macromolecule biosynthetic process   | 310.973 | 360  | 0.000655445 | up |
| positive regulation of RNA metabolic process                | 266.548 | 312  | 0.000670414 | up |
| protein tyrosine kinase activity                            | 72.1249 | 96   | 0.0006939   | up |
| protein domain specific binding                             | 199.65  | 239  | 0.000713717 | up |
| cell                                                        | 7430.95 | 7524 | 0.000716209 | up |
| guanyl-nucleotide exchange factor activity                  | 77.3513 | 102  | 0.000722269 | up |
| polysaccharide biosynthetic process                         | 31.3586 | 47   | 0.000736533 | up |
| cellular response to hormone stimulus                       | 93.0307 | 120  | 0.000736533 | up |
| cell part                                                   | 7430.43 | 7523 | 0.000772315 | up |
| central nervous system development                          | 239.371 | 282  | 0.000802517 | up |
| positive regulation of transcription, DNA-dependent         | 263.413 | 308  | 0.000818452 | up |
| negative regulation of programmed cell death                | 210.103 | 250  | 0.000837817 | up |
| negative regulation of macromolecule metabolic process      | 422.296 | 478  | 0.000853462 | up |
| cytoplasmic membrane-bounded vesicle                        | 331.356 | 381  | 0.000853462 | up |
| transmembrane receptor protein kinase activity              | 42.8568 | 61   | 0.000854686 | up |
| ion binding                                                 | 1894.58 | 2001 | 0.000899695 | up |
| regulation of metabolic process                             | 1969.32 | 2077 | 0.000923804 | up |
| regulation of protein modification process                  | 193.901 | 232  | 0.000923804 | up |
| metal ion binding                                           | 1868.45 | 1974 | 0.000937764 | up |
| regulation of transcription from RNA polymerase II promoter | 388.847 | 442  | 0.000951175 | up |
| skeletal system development                                 | 198.605 | 237  | 0.00097619  | up |
| cation binding                                              | 1889.36 | 1995 | 0.000976726 | up |
| negative regulation of signaling pathway                    | 139.023 | 171  | 0.00112038  | up |
| nuclear part                                                | 982.571 | 1063 | 0.00112179  | up |
| regulation of erythrocyte differentiation                   | 10.4529 | 19   | 0.00113535  | up |
| microtubule cytoskeleton                                    | 296.862 | 343  | 0.00113913  | up |
| plasma membrane part                                        | 1029.09 | 1111 | 0.00113913  | up |
| regulation of anatomical structure size                     | 209.058 | 248  | 0.00113913  | up |
| positive regulation of signal transduction                  | 143.727 | 176  | 0.00123248  | up |
| induction of programmed cell death                          | 170.905 | 206  | 0.00124567  | up |
| posttranscriptional regulation of gene expression           | 124.912 | 155  | 0.0012488   | up |
| negative regulation of apoptosis                            | 207.49  | 246  | 0.00126981  | up |
| negative regulation of cellular metabolic process           | 413.411 | 467  | 0.00127883  | up |
| focal adhesion                                              | 44.9474 | 63   | 0.00131541  | up |
| cell-substrate adhesion                                     | 77.3513 | 101  | 0.00131767  | up |
| negative regulation of metabolic process                    | 454.178 | 510  | 0.00133435  | up |
| regulation of Rho protein signal transduction               | 55.9229 | 76   | 0.00136521  | up |
| positive regulation of catalytic activity                   | 285.364 | 330  | 0.00137471  | up |
| axon                                                        | 91.4627 | 117  | 0.00142957  | up |
| negative regulation of cellular biosynthetic process        | 320.903 | 368  | 0.00142957  | up |
| negative regulation of biosynthetic process                 | 325.607 | 373  | 0.00143553  | up |
| induction of apoptosis                                      | 170.382 | 205  | 0.00144851  | up |

|                                                                                              |         |      |            |    |
|----------------------------------------------------------------------------------------------|---------|------|------------|----|
| negative regulation of cell communication                                                    | 174.04  | 209  | 0.00145    | up |
| cell motility                                                                                | 254.005 | 296  | 0.00145    | up |
| localization of cell                                                                         | 254.005 | 296  | 0.00145    | up |
| mesenchymal cell differentiation                                                             | 37.6304 | 54   | 0.00145995 | up |
| positive regulation of ossification                                                          | 14.1114 | 24   | 0.00146494 | up |
| peptidyl-amino acid modification                                                             | 124.389 | 154  | 0.00146892 | up |
| transcription cofactor activity                                                              | 186.061 | 222  | 0.00154236 | up |
| positive regulation of MAPKKK cascade                                                        | 45.9927 | 64   | 0.00157098 | up |
| cellular response to stress                                                                  | 350.694 | 399  | 0.00178601 | up |
| regulation of MAPKKK cascade                                                                 | 88.3269 | 113  | 0.00180042 | up |
| interphase                                                                                   | 67.4211 | 89   | 0.00180537 | up |
| protein targeting                                                                            | 140.069 | 171  | 0.0018069  | up |
| response to inorganic substance                                                              | 121.253 | 150  | 0.00187302 | up |
| transcription from RNA polymerase II promoter                                                | 470.902 | 526  | 0.00198255 | up |
| activation of protein kinase activity                                                        | 63.2399 | 84   | 0.00198768 | up |
| positive regulation of intracellular protein kinase cascade                                  | 116.027 | 144  | 0.00202359 | up |
| regulation of cellular metabolic process                                                     | 1876.29 | 1976 | 0.00203585 | up |
| anchoring junction                                                                           | 84.1457 | 108  | 0.00204324 | up |
| positive regulation of cell proliferation                                                    | 234.667 | 274  | 0.00208898 | up |
| neuron projection development                                                                | 166.723 | 200  | 0.00211809 | up |
| catabolic process                                                                            | 631.354 | 694  | 0.00217741 | up |
| positive regulation of osteoblast differentiation                                            | 13.5887 | 23   | 0.00235878 | up |
| cell cycle process                                                                           | 342.332 | 389  | 0.00241161 | up |
| cell-substrate junction                                                                      | 50.6965 | 69   | 0.00247086 | up |
| cellular response to peptide hormone stimulus                                                | 50.6965 | 69   | 0.00247086 | up |
| cytoskeletal adaptor activity                                                                | 7.31702 | 14   | 0.00247434 | up |
| cell cycle                                                                                   | 513.759 | 570  | 0.00253478 | up |
| negative regulation of transcription                                                         | 260.277 | 301  | 0.00253478 | up |
| telencephalon development                                                                    | 46.5153 | 64   | 0.00253478 | up |
| cellular response to insulin stimulus                                                        | 46.5153 | 64   | 0.00253478 | up |
| interphase of mitotic cell cycle                                                             | 62.7173 | 83   | 0.00253478 | up |
| negative regulation of mitotic cell cycle                                                    | 11.4982 | 20   | 0.00287892 | up |
| camera-type eye development                                                                  | 63.7626 | 84   | 0.00294441 | up |
| cell-substrate adherens junction                                                             | 47.5606 | 65   | 0.00307676 | up |
| polypeptide N-acetylgalactosaminyltransferase activity                                       | 9.40759 | 17   | 0.00311311 | up |
| eye development                                                                              | 80.4872 | 103  | 0.00329313 | up |
| site of polarized growth                                                                     | 33.4492 | 48   | 0.00330005 | up |
| tube development                                                                             | 175.086 | 208  | 0.00331174 | up |
| cellular membrane organization                                                               | 225.782 | 263  | 0.00332597 | up |
| fibroblast growth factor receptor signaling pathway                                          | 24.5643 | 37   | 0.00335323 | up |
| regulation of osteoblast differentiation                                                     | 24.5643 | 37   | 0.00335323 | up |
| response to endogenous stimulus                                                              | 260.277 | 300  | 0.00346061 | up |
| Ras guanyl-nucleotide exchange factor activity                                               | 44.4247 | 61   | 0.00379776 | up |
| mesenchymal cell development                                                                 | 36.0624 | 51   | 0.00379776 | up |
| endosome transport                                                                           | 36.0624 | 51   | 0.00379776 | up |
| membrane organization                                                                        | 226.305 | 263  | 0.00401396 | up |
| negative regulation of gene expression                                                       | 291.635 | 333  | 0.00413403 | up |
| negative regulation of tumor necrosis factor production                                      | 6.79437 | 13   | 0.00437983 | up |
| kinase binding                                                                               | 107.665 | 133  | 0.00446537 | up |
| growth cone                                                                                  | 32.9266 | 47   | 0.00459069 | up |
| response to metal ion                                                                        | 78.3966 | 100  | 0.00465437 | up |
| positive regulation of bone mineralization                                                   | 10.9755 | 19   | 0.00469224 | up |
| positive regulation of phosphorus metabolic process                                          | 73.1702 | 94   | 0.00475824 | up |
| regulation of cell cycle process                                                             | 73.1702 | 94   | 0.00475824 | up |
| positive regulation of phosphate metabolic process                                           | 73.1702 | 94   | 0.00475824 | up |
| protein oligomerization                                                                      | 99.825  | 124  | 0.0049948  | up |
| negative regulation of cell cycle process                                                    | 22.4737 | 34   | 0.0050401  | up |
| positive regulation of anti-apoptosis                                                        | 17.7699 | 28   | 0.00505693 | up |
| membrane                                                                                     | 3578.54 | 3689 | 0.00515826 | up |
| embryonic camera-type eye development                                                        | 8.88495 | 16   | 0.00517429 | up |
| positive regulation of phosphorylation                                                       | 71.6022 | 92   | 0.00534259 | up |
| transcription activator activity                                                             | 221.601 | 257  | 0.00537773 | up |
| mitotic cell cycle                                                                           | 251.392 | 289  | 0.00538542 | up |
| nucleoside triphosphate metabolic process                                                    | 130.661 | 158  | 0.00545415 | up |
| regulation of MAP kinase activity                                                            | 80.4872 | 102  | 0.00559568 | up |
| cell morphogenesis involved in neuron differentiation                                        | 124.389 | 151  | 0.00563766 | up |
| regulation of cell size                                                                      | 146.34  | 175  | 0.00601201 | up |
| nuclear matrix                                                                               | 32.4039 | 46   | 0.00625826 | up |
| regulation of Wnt receptor signaling pathway                                                 | 47.5606 | 64   | 0.00627721 | up |
| multicellular organism growth                                                                | 36.5851 | 51   | 0.00634312 | up |
| negative regulation of nucleobase, nucleoside, nucleotide and nucleic acid metabolic process | 292.158 | 332  | 0.00634312 | up |
| muscle structure development                                                                 | 158.361 | 188  | 0.00634312 | up |
| organ growth                                                                                 | 25.0869 | 37   | 0.0065541  | up |
| ribonucleotide metabolic process                                                             | 141.114 | 169  | 0.00666787 | up |
| response to calcium ion                                                                      | 30.836  | 44   | 0.00679627 | up |
| neuron projection morphogenesis                                                              | 127.525 | 154  | 0.00684608 | up |
| cell-matrix adhesion                                                                         | 60.6267 | 79   | 0.00686772 | up |
| protein localization in nucleus                                                              | 79.9645 | 101  | 0.00690817 | up |
| negative regulation of nitrogen compound metabolic process                                   | 295.294 | 335  | 0.00690817 | up |
| nucleoside-triphosphatase activity                                                           | 367.941 | 412  | 0.00696261 | up |
| regulation of multicellular organism growth                                                  | 29.2681 | 42   | 0.00737334 | up |
| positive regulation of multicellular organism growth                                         | 10.4529 | 18   | 0.00746339 | up |
| protein self-association                                                                     | 6.27173 | 12   | 0.0075221  | up |
| positive regulation of erythrocyte differentiation                                           | 6.27173 | 12   | 0.0075221  | up |
| Rho guanyl-nucleotide exchange factor activity                                               | 37.6304 | 52   | 0.00766092 | up |
| pyrophosphatase activity                                                                     | 382.575 | 427  | 0.00776687 | up |

|                                                                                        |         |      |            |    |
|----------------------------------------------------------------------------------------|---------|------|------------|----|
| ligase activity                                                                        | 220.033 | 254  | 0.00808603 | up |
| regulation of cell cycle                                                               | 233.099 | 268  | 0.00813508 | up |
| regulation of cellular component size                                                  | 175.608 | 206  | 0.00824149 | up |
| organ morphogenesis                                                                    | 340.241 | 382  | 0.00825252 | up |
| regulation of catabolic process                                                        | 145.295 | 173  | 0.00825252 | up |
| regulation of cell morphogenesis                                                       | 82.0551 | 103  | 0.00825252 | up |
| angiogenesis                                                                           | 120.731 | 146  | 0.00836701 | up |
| regulation of cell projection organization                                             | 67.9437 | 87   | 0.00839655 | up |
| nuclear periphery                                                                      | 36.0624 | 50   | 0.00841624 | up |
| membrane-enclosed lumen                                                                | 971.595 | 1039 | 0.00851301 | up |
| lipid biosynthetic process                                                             | 197.037 | 229  | 0.00855956 | up |
| purine ribonucleotide metabolic process                                                | 135.365 | 162  | 0.00855956 | up |
| proteolysis involved in cellular protein catabolic process                             | 172.995 | 203  | 0.00855956 | up |
| respiratory system development                                                         | 57.4909 | 75   | 0.00855956 | up |
| cell leading edge                                                                      | 85.7136 | 107  | 0.00859247 | up |
| muscle cell differentiation                                                            | 74.2155 | 94   | 0.00883591 | up |
| glycosaminoglycan biosynthetic process                                                 | 12.0208 | 20   | 0.008918   | up |
| enzyme activator activity                                                              | 174.04  | 204  | 0.008918   | up |
| positive regulation of biomineral formation                                            | 12.0208 | 20   | 0.008918   | up |
| protein heterooligomerization                                                          | 30.3134 | 43   | 0.00904444 | up |
| dephosphorylation                                                                      | 86.7589 | 108  | 0.00932801 | up |
| cell growth                                                                            | 137.455 | 164  | 0.00952501 | up |
| peptidyl-tyrosine modification                                                         | 58.5361 | 76   | 0.00958124 | up |
| negative regulation of phosphorus metabolic process                                    | 32.9266 | 46   | 0.010126   | up |
| cellular macromolecule catabolic process                                               | 240.416 | 275  | 0.010126   | up |
| regulation of anti-apoptosis                                                           | 21.4284 | 32   | 0.010126   | up |
| negative regulation of phosphate metabolic process                                     | 32.9266 | 46   | 0.010126   | up |
| Golgi vesicle transport                                                                | 70.0343 | 89   | 0.010126   | up |
| anatomical structure formation involved in morphogenesis                               | 240.416 | 275  | 0.010126   | up |
| protein amino acid autophosphorylation                                                 | 46.5153 | 62   | 0.0102595  | up |
| positive regulation of protein amino acid phosphorylation                              | 64.8079 | 83   | 0.0104758  | up |
| ER-nucleus signaling pathway                                                           | 18.2925 | 28   | 0.0106813  | up |
| cellular protein catabolic process                                                     | 174.563 | 204  | 0.0106989  | up |
| organelle lumen                                                                        | 953.826 | 1019 | 0.0107215  | up |
| cell cycle phase                                                                       | 261.322 | 297  | 0.0109587  | up |
| hydrolase activity, acting on acid anhydrides, in phosphorus-containing anhydrides     | 384.143 | 427  | 0.0109899  | up |
| carbohydrate biosynthetic process                                                      | 71.0796 | 90   | 0.011103   | up |
| negative regulation of RNA metabolic process                                           | 213.761 | 246  | 0.0114354  | up |
| regulation of the force of heart contraction                                           | 9.93024 | 17   | 0.0114802  | up |
| aging                                                                                  | 65.8532 | 84   | 0.0114802  | up |
| macromolecule catabolic process                                                        | 286.932 | 324  | 0.0116089  | up |
| regulation of mitotic cell cycle                                                       | 89.8948 | 111  | 0.0116161  | up |
| hydrolase activity                                                                     | 1146.16 | 1216 | 0.011669   | up |
| transcription coactivator activity                                                     | 109.755 | 133  | 0.0116916  | up |
| transmembrane receptor protein tyrosine kinase activity                                | 33.9719 | 47   | 0.012129   | up |
| regulation of cell development                                                         | 139.023 | 165  | 0.012187   | up |
| protein kinase binding                                                                 | 90.9401 | 112  | 0.0125413  | up |
| extracellular matrix                                                                   | 187.107 | 217  | 0.0126472  | up |
| polysaccharide metabolic process                                                       | 64.2852 | 82   | 0.0128753  | up |
| sensory organ development                                                              | 129.093 | 154  | 0.0128753  | up |
| heterocycle metabolic process                                                          | 306.269 | 344  | 0.0131317  | up |
| intracellular organelle lumen                                                          | 935.01  | 998  | 0.0135286  | up |
| purine nucleoside triphosphate metabolic process                                       | 126.48  | 151  | 0.0136154  | up |
| negative regulation of transcription, DNA-dependent                                    | 210.626 | 242  | 0.0137171  | up |
| regulation of localization                                                             | 379.44  | 421  | 0.013766   | up |
| response to hormone stimulus                                                           | 233.099 | 266  | 0.0138597  | up |
| negative regulation of cytokine production                                             | 20.9058 | 31   | 0.0140092  | up |
| hydrolase activity, acting on acid anhydrides                                          | 386.234 | 428  | 0.0141248  | up |
| positive regulation of cellular component organization                                 | 116.55  | 140  | 0.0141248  | up |
| positive regulation of myeloid cell differentiation                                    | 19.3378 | 29   | 0.0146556  | up |
| retina development in camera-type eye                                                  | 19.3378 | 29   | 0.0146556  | up |
| regulation of primary metabolic process                                                | 1783.78 | 1865 | 0.0146556  | up |
| phospholipid binding                                                                   | 96.6892 | 118  | 0.0146932  | up |
| negative regulation of phosphorylation                                                 | 30.836  | 43   | 0.0146932  | up |
| peptidyl-tyrosine phosphorylation                                                      | 57.4909 | 74   | 0.0147593  | up |
| nuclear transport                                                                      | 113.936 | 137  | 0.0147593  | up |
| regulation of myeloid cell differentiation                                             | 37.6304 | 51   | 0.0151846  | up |
| nuclear inner membrane                                                                 | 14.634  | 23   | 0.0153099  | up |
| peptidyl-threonine modification                                                        | 14.634  | 23   | 0.0153099  | up |
| bone mineralization                                                                    | 25.0869 | 36   | 0.0156375  | up |
| osteoblast differentiation                                                             | 40.2436 | 54   | 0.015763   | up |
| Rho protein signal transduction                                                        | 63.7626 | 81   | 0.015763   | up |
| regulation of cellular component movement                                              | 125.957 | 150  | 0.015763   | up |
| potassium ion transport                                                                | 70.0343 | 88   | 0.0164396  | up |
| axonogenesis                                                                           | 112.368 | 135  | 0.0164396  | up |
| positive regulation of transcription from RNA polymerase II promoter                   | 203.831 | 234  | 0.0166147  | up |
| tissue morphogenesis                                                                   | 149.999 | 176  | 0.0166147  | up |
| muscle tissue development                                                              | 88.8495 | 109  | 0.0166147  | up |
| regulation of transmembrane receptor protein serine/threonine kinase signaling pathway | 48.0833 | 63   | 0.0166147  | up |
| protein catabolic process                                                              | 200.173 | 230  | 0.0169744  | up |
| transcription regulator activity                                                       | 764.106 | 820  | 0.0172805  | up |
| nucleocytoplasmic transport                                                            | 113.414 | 136  | 0.0173284  | up |
| anti-apoptosis                                                                         | 120.731 | 144  | 0.0173703  | up |
| ribonucleoside triphosphate metabolic process                                          | 124.389 | 148  | 0.0173703  | up |
| response to unfolded protein                                                           | 31.8813 | 44   | 0.0174954  | up |
| insulin receptor signaling pathway                                                     | 27.7001 | 39   | 0.0176082  | up |

|                                                                          |         |     |           |    |
|--------------------------------------------------------------------------|---------|-----|-----------|----|
| vasculogenesis                                                           | 21.9511 | 32  | 0.0180829 | up |
| muscle organ development                                                 | 132.752 | 157 | 0.0181171 | up |
| interspecies interaction between organisms                               | 172.473 | 200 | 0.0181171 | up |
| growth factor binding                                                    | 56.9682 | 73  | 0.0181955 | up |
| regulation of cellular catabolic process                                 | 125.435 | 149 | 0.0181955 | up |
| biological adhesion                                                      | 411.321 | 453 | 0.018245  | up |
| positive regulation of cell projection organization                      | 34.4945 | 47  | 0.0185996 | up |
| protein localization in organelle                                        | 108.187 | 130 | 0.0190866 | up |
| regulation of biomineral formation                                       | 20.3831 | 30  | 0.0192705 | up |
| negative regulation of Wnt receptor signaling pathway                    | 30.3134 | 42  | 0.0193391 | up |
| cell adhesion                                                            | 410.798 | 452 | 0.020137  | up |
| glial cell differentiation                                               | 39.721  | 53  | 0.0202685 | up |
| GTPase activator activity                                                | 112.891 | 135 | 0.0202788 | up |
| purine ribonucleoside triphosphate metabolic process                     | 123.867 | 147 | 0.0202788 | up |
| purine nucleotide metabolic process                                      | 224.214 | 255 | 0.0205068 | up |
| sodium:amino acid symporter activity                                     | 5.22644 | 10  | 0.0211498 | up |
| cell projection cytoplasm                                                | 5.22644 | 10  | 0.0211498 | up |
| transforming growth factor beta binding                                  | 5.22644 | 10  | 0.0211498 | up |
| regulation of cell growth                                                | 110.278 | 132 | 0.0213612 | up |
| membrane protein proteolysis                                             | 17.2473 | 26  | 0.0213612 | up |
| microtubule organizing center                                            | 140.591 | 165 | 0.0215321 | up |
| regulation of neuron differentiation                                     | 93.0307 | 113 | 0.0215321 | up |
| regulation of nucleotide catabolic process                               | 76.8287 | 95  | 0.0216429 | up |
| regulation of purine nucleotide catabolic process                        | 76.8287 | 95  | 0.0216429 | up |
| regulation of S phase                                                    | 12.5435 | 20  | 0.0216519 | up |
| acetylgalactosaminyltransferase activity                                 | 15.6793 | 24  | 0.021903  | up |
| negative regulation of transferase activity                              | 59.0588 | 75  | 0.0220556 | up |
| cytoskeleton organization                                                | 264.981 | 298 | 0.0220636 | up |
| morphogenesis of an epithelium                                           | 114.982 | 137 | 0.0223765 | up |
| nucleoside phosphate metabolic process                                   | 281.183 | 315 | 0.0228645 | up |
| nucleotide metabolic process                                             | 281.183 | 315 | 0.0228645 | up |
| lamellipodium                                                            | 40.7662 | 54  | 0.0228892 | up |
| regulation of nervous system development                                 | 123.344 | 146 | 0.0233886 | up |
| PDZ domain binding                                                       | 27.1775 | 38  | 0.0233938 | up |
| protein amino acid dephosphorylation                                     | 68.989  | 86  | 0.024077  | up |
| BMP signaling pathway                                                    | 33.9719 | 46  | 0.02414   | up |
| cell-cell junction                                                       | 102.438 | 123 | 0.0246981 | up |
| perinuclear region of cytoplasm                                          | 168.814 | 195 | 0.0248027 | up |
| potassium channel activity                                               | 66.3758 | 83  | 0.0248719 | up |
| regulation of cell adhesion                                              | 78.9193 | 97  | 0.0249219 | up |
| nuclear import                                                           | 72.6475 | 90  | 0.0250522 | up |
| cell fraction                                                            | 550.344 | 596 | 0.0259935 | up |
| ribonucleotide catabolic process                                         | 76.306  | 94  | 0.0259935 | up |
| cartilage development                                                    | 49.6512 | 64  | 0.0259935 | up |
| morphogenesis of a branching structure                                   | 67.4211 | 84  | 0.0270899 | up |
| peptidyl-serine modification                                             | 32.4039 | 44  | 0.0270899 | up |
| face development                                                         | 8.88495 | 15  | 0.0274617 | up |
| brain development                                                        | 163.588 | 189 | 0.0279154 | up |
| phospholipid biosynthetic process                                        | 55.9229 | 71  | 0.0279154 | up |
| enzyme regulator activity                                                | 436.408 | 477 | 0.0279357 | up |
| organelle envelope                                                       | 331.356 | 367 | 0.0279357 | up |
| protein import into nucleus                                              | 71.0796 | 88  | 0.0281112 | up |
| respiratory tube development                                             | 53.3097 | 68  | 0.0282616 | up |
| regulation of bone mineralization                                        | 18.2925 | 27  | 0.0282616 | up |
| regulation of protein localization                                       | 90.9401 | 110 | 0.0282616 | up |
| striated muscle tissue development                                       | 84.6683 | 103 | 0.0291355 | up |
| regulation of GTP catabolic process                                      | 68.4664 | 85  | 0.0291355 | up |
| regulation of GTPase activity                                            | 68.4664 | 85  | 0.0291355 | up |
| regulation of Ras GTPase activity                                        | 59.5814 | 75  | 0.029544  | up |
| cofactor binding                                                         | 124.912 | 147 | 0.0296674 | up |
| ureteric bud development                                                 | 30.836  | 42  | 0.029796  | up |
| dorsal/ventral pattern formation                                         | 30.836  | 42  | 0.029796  | up |
| mRNA metabolic process                                                   | 188.152 | 215 | 0.0301273 | up |
| actin cytoskeleton reorganization                                        | 10.4529 | 17  | 0.0301273 | up |
| pigment cell differentiation                                             | 10.4529 | 17  | 0.0301273 | up |
| positive regulation of protein metabolic process                         | 162.02  | 187 | 0.0301273 | up |
| morphogenesis of an epithelial fold                                      | 10.4529 | 17  | 0.0301273 | up |
| negative regulation of transcription from RNA polymerase II promoter     | 149.999 | 174 | 0.0306427 | up |
| transmembrane receptor protein serine/threonine kinase signaling pathway | 85.7136 | 104 | 0.0306623 | up |
| induction of apoptosis by intracellular signals                          | 26.6548 | 37  | 0.0306974 | up |
| post-embryonic development                                               | 33.4492 | 45  | 0.0307565 | up |
| response to extracellular stimulus                                       | 137.978 | 161 | 0.0307565 | up |
| GTP catabolic process                                                    | 69.5117 | 86  | 0.0308088 | up |
| envelope                                                                 | 337.628 | 373 | 0.0308088 | up |
| regulation of cell morphogenesis involved in differentiation             | 51.7418 | 66  | 0.0310017 | up |
| protein import                                                           | 93.0307 | 112 | 0.0310017 | up |
| lung development                                                         | 51.7418 | 66  | 0.0310017 | up |
| regulation of alpha-beta T cell differentiation                          | 12.0208 | 19  | 0.0310017 | up |
| head development                                                         | 12.0208 | 19  | 0.0310017 | up |
| regulation of cartilage development                                      | 12.0208 | 19  | 0.0310017 | up |
| regulation of response to stress                                         | 167.769 | 193 | 0.0310017 | up |
| phosphoprotein phosphatase activity                                      | 83.1004 | 101 | 0.0316422 | up |
| gliogenesis                                                              | 46.5153 | 60  | 0.0317942 | up |
| ubiquitin-dependent protein catabolic process                            | 147.386 | 171 | 0.0318289 | up |
| identical protein binding                                                | 356.966 | 393 | 0.032292  | up |
| phosphoric ester hydrolase activity                                      | 173.518 | 199 | 0.03251   | up |

|                                                                                  |         |      |           |    |
|----------------------------------------------------------------------------------|---------|------|-----------|----|
| biological_process                                                               | 7093.85 | 7164 | 0.0331136 | up |
| protein modification by small protein conjugation or removal                     | 182.925 | 209  | 0.0331136 | up |
| nuclear lumen                                                                    | 768.809 | 820  | 0.033185  | up |
| protein amino acid methylation                                                   | 25.0869 | 35   | 0.0332904 | up |
| protein amino acid alkylation                                                    | 25.0869 | 35   | 0.0332904 | up |
| embryonic camera-type eye morphogenesis                                          | 6.79437 | 12   | 0.0332904 | up |
| cell cycle arrest                                                                | 61.672  | 77   | 0.0338828 | up |
| chromatin modification                                                           | 166.201 | 191  | 0.0338828 | up |
| ubiquitin ligase complex                                                         | 67.9437 | 84   | 0.0340209 | up |
| regulation of neurogenesis                                                       | 113.414 | 134  | 0.0340942 | up |
| foregut morphogenesis                                                            | 4.7038  | 9    | 0.0341654 | up |
| dorsal/ventral axis specification                                                | 4.7038  | 9    | 0.0341654 | up |
| dendrite cytoplasm                                                               | 4.7038  | 9    | 0.0341654 | up |
| negative regulation of S phase of mitotic cell cycle                             | 4.7038  | 9    | 0.0341654 | up |
| lipid metabolic process                                                          | 464.631 | 505  | 0.0343521 | up |
| muscle cell proliferation                                                        | 34.4945 | 46   | 0.0346234 | up |
| melanosome                                                                       | 47.5606 | 61   | 0.0348093 | up |
| pigment granule                                                                  | 47.5606 | 61   | 0.0348093 | up |
| epithelial to mesenchymal transition                                             | 19.3378 | 28   | 0.0349969 | up |
| proteinaceous extracellular matrix                                               | 158.884 | 183  | 0.0349969 | up |
| regulation of nucleotide metabolic process                                       | 142.159 | 165  | 0.0350973 | up |
| nucleobase, nucleoside and nucleotide metabolic process                          | 292.681 | 325  | 0.0351198 | up |
| purine ribonucleotide catabolic process                                          | 75.2608 | 92   | 0.0355767 | up |
| regulation of neuron projection development                                      | 56.4456 | 71   | 0.0355767 | up |
| response to nutrient levels                                                      | 126.48  | 148  | 0.0356934 | up |
| regulation of locomotion                                                         | 126.48  | 148  | 0.0356934 | up |
| protein phosphatase binding                                                      | 23.519  | 33   | 0.0361363 | up |
| cellular carbohydrate metabolic process                                          | 209.58  | 237  | 0.0361363 | up |
| cell division                                                                    | 183.448 | 209  | 0.03796   | up |
| nucleoside triphosphate catabolic process                                        | 76.306  | 93   | 0.0381238 | up |
| cellular polysaccharide metabolic process                                        | 32.9266 | 44   | 0.0387096 | up |
| response to oxygen levels                                                        | 79.9645 | 97   | 0.0388116 | up |
| positive regulation of cell development                                          | 45.9927 | 59   | 0.0390843 | up |
| phosphatase binding                                                              | 26.1322 | 36   | 0.039508  | up |
| coenzyme binding                                                                 | 87.2816 | 105  | 0.0396758 | up |
| endoplasmic reticulum                                                            | 518.463 | 560  | 0.0399467 | up |
| developmental programmed cell death                                              | 8.36231 | 14   | 0.0402796 | up |
| positive regulation of lymphocyte differentiation                                | 16.202  | 24   | 0.0402796 | up |
| regulation of transport                                                          | 268.639 | 299  | 0.040799  | up |
| energy reserve metabolic process                                                 | 28.7454 | 39   | 0.0416851 | up |
| actin filament organization                                                      | 71.0796 | 87   | 0.0416851 | up |
| small conjugating protein ligase activity                                        | 106.619 | 126  | 0.0416851 | up |
| positive regulation of protein modification process                              | 122.299 | 143  | 0.0417706 | up |
| molecular_function                                                               | 7631.65 | 7689 | 0.0419304 | up |
| activation of MAPKK activity                                                     | 14.634  | 22   | 0.0420179 | up |
| voltage-gated potassium channel activity                                         | 49.6512 | 63   | 0.0420179 | up |
| mesenchymal cell proliferation                                                   | 14.634  | 22   | 0.0420179 | up |
| SH3 domain binding                                                               | 49.6512 | 63   | 0.0420179 | up |
| regulation of steroid biosynthetic process                                       | 14.634  | 22   | 0.0420179 | up |
| regulation of morphogenesis of a branching structure                             | 14.634  | 22   | 0.0420179 | up |
| positive regulation of stress-activated protein kinase signaling cascade         | 14.634  | 22   | 0.0420179 | up |
| protein dimerization activity                                                    | 303.134 | 335  | 0.0429671 | up |
| steroid biosynthetic process                                                     | 55.9229 | 70   | 0.043011  | up |
| induction of apoptosis by extracellular signals                                  | 55.9229 | 70   | 0.043011  | up |
| gland morphogenesis                                                              | 44.4247 | 57   | 0.043011  | up |
| clathrin vesicle coat                                                            | 9.93024 | 16   | 0.043011  | up |
| melanocyte differentiation                                                       | 9.93024 | 16   | 0.043011  | up |
| ovulation                                                                        | 9.93024 | 16   | 0.043011  | up |
| negative regulation of kinase activity                                           | 55.9229 | 70   | 0.043011  | up |
| cellular polysaccharide biosynthetic process                                     | 20.3831 | 29   | 0.043011  | up |
| protein ubiquitination involved in ubiquitin-dependent protein catabolic process | 9.93024 | 16   | 0.043011  | up |
| aminoglycan biosynthetic process                                                 | 13.0661 | 20   | 0.0431173 | up |
| peptidyl-threonine phosphorylation                                               | 13.0661 | 20   | 0.0431173 | up |
| nucleoplasm part                                                                 | 304.179 | 336  | 0.0431173 | up |
| digestive tract morphogenesis                                                    | 13.0661 | 20   | 0.0431173 | up |
| regulation of cellular response to stress                                        | 72.1249 | 88   | 0.0434483 | up |
| positive regulation of Wnt receptor signaling pathway                            | 11.4982 | 18   | 0.0436227 | up |
| locomotion                                                                       | 315.677 | 348  | 0.0436227 | up |
| insoluble fraction                                                               | 423.864 | 461  | 0.0436573 | up |
| negative regulation of protein kinase activity                                   | 53.3097 | 67   | 0.0436573 | up |
| response to hypoxia                                                              | 75.7834 | 92   | 0.04394   | up |
| protein C-terminus binding                                                       | 75.7834 | 92   | 0.04394   | up |
| nuclear membrane                                                                 | 65.8532 | 81   | 0.04394   | up |
| regulation of organelle organization                                             | 124.389 | 145  | 0.04394   | up |
| regulation of system process                                                     | 162.542 | 186  | 0.04394   | up |
| positive regulation of cellular protein metabolic process                        | 154.18  | 177  | 0.0445343 | up |
| nucleobase, nucleoside, nucleotide and nucleic acid catabolic process            | 105.051 | 124  | 0.0445343 | up |
| nucleobase, nucleoside and nucleotide catabolic process                          | 105.051 | 124  | 0.0445343 | up |
| peptidyl-serine phosphorylation                                                  | 27.1775 | 37   | 0.0447956 | up |
| protein modification by small protein conjugation                                | 158.884 | 182  | 0.0447956 | up |
| cell projection morphogenesis                                                    | 145.818 | 168  | 0.0447956 | up |
| purine nucleotide catabolic process                                              | 90.4174 | 108  | 0.0450134 | up |
| modification-dependent protein catabolic process                                 | 150.522 | 173  | 0.0452532 | up |
| modification-dependent macromolecule catabolic process                           | 150.522 | 173  | 0.0452532 | up |
| chondrocyte differentiation                                                      | 18.8152 | 27   | 0.0455873 | up |
| ribonucleoside triphosphate catabolic process                                    | 73.1702 | 89   | 0.0455873 | up |

|                                                                                                              |         |      |             |      |
|--------------------------------------------------------------------------------------------------------------|---------|------|-------------|------|
| purine ribonucleoside triphosphate catabolic process                                                         | 73.1702 | 89   | 0.0455873   | up   |
| lysine N-methyltransferase activity                                                                          | 18.8152 | 27   | 0.0455873   | up   |
| protein-lysine N-methyltransferase activity                                                                  | 18.8152 | 27   | 0.0455873   | up   |
| histone-lysine N-methyltransferase activity                                                                  | 18.8152 | 27   | 0.0455873   | up   |
| N-methyltransferase activity                                                                                 | 29.7907 | 40   | 0.0461752   | up   |
| negative regulation of protein amino acid phosphorylation                                                    | 22.9963 | 32   | 0.046192    | up   |
| cytoplasmic vesicle membrane                                                                                 | 118.118 | 138  | 0.0464712   | up   |
| dendrite                                                                                                     | 95.1212 | 113  | 0.0468304   | up   |
| response to organic nitrogen                                                                                 | 40.2436 | 52   | 0.047522    | up   |
| embryonic development                                                                                        | 321.949 | 354  | 0.0476929   | up   |
| ligase activity, forming carbon-nitrogen bonds                                                               | 139.546 | 161  | 0.0477209   | up   |
| cell part morphogenesis                                                                                      | 152.612 | 175  | 0.0478791   | up   |
| purine nucleoside triphosphate catabolic process                                                             | 74.2155 | 90   | 0.0480085   | up   |
| regulation of response to external stimulus                                                                  | 96.1665 | 114  | 0.0492715   | up   |
| response to endoplasmic reticulum stress                                                                     | 17.2473 | 25   | 0.0494206   | up   |
| labyrinthine layer development                                                                               | 17.2473 | 25   | 0.0494206   | up   |
| vesicle membrane                                                                                             | 123.867 | 144  | 0.0494392   | up   |
| ovulation from ovarian follicle                                                                              | 6.27173 | 11   | 0.0496797   | up   |
| clathrin coat of trans-Golgi network vesicle                                                                 | 6.27173 | 11   | 0.0496797   | up   |
| histone H2A acetylation                                                                                      | 6.27173 | 11   | 0.0496797   | up   |
| olfactory receptor activity                                                                                  | 180.312 | 24   | 2.90E-71    | down |
| sensory perception of smell                                                                                  | 189.197 | 33   | 1.42E-66    | down |
| sensory perception of chemical stimulus                                                                      | 209.58  | 50   | 3.33E-61    | down |
| G-protein coupled receptor activity                                                                          | 396.164 | 240  | 1.11E-28    | down |
| sensory perception                                                                                           | 389.37  | 253  | 6.42E-22    | down |
| cognition                                                                                                    | 439.021 | 309  | 1.21E-17    | down |
| transmembrane receptor activity                                                                              | 608.88  | 459  | 2.77E-17    | down |
| receptor activity                                                                                            | 813.234 | 653  | 2.73E-15    | down |
| intermediate filament cytoskeleton                                                                           | 91.9854 | 39   | 5.09E-14    | down |
| intermediate filament                                                                                        | 87.2816 | 37   | 2.66E-13    | down |
| neurological system process                                                                                  | 616.197 | 485  | 2.86E-13    | down |
| signal transducer activity                                                                                   | 1037.45 | 908  | 3.04E-08    | down |
| molecular transducer activity                                                                                | 1037.45 | 908  | 3.04E-08    | down |
| system process                                                                                               | 800.168 | 689  | 1.12E-07    | down |
| keratin filament                                                                                             | 42.8568 | 19   | 3.59E-06    | down |
| keratinization                                                                                               | 20.9058 | 5    | 8.29E-06    | down |
| peptidase inhibitor activity                                                                                 | 77.3513 | 48   | 3.50E-05    | down |
| endopeptidase inhibitor activity                                                                             | 73.1702 | 45   | 4.62E-05    | down |
| endopeptidase regulator activity                                                                             | 74.7381 | 47   | 7.72E-05    | down |
| peptidase regulator activity                                                                                 | 89.3721 | 61   | 0.000270986 | down |
| extracellular region                                                                                         | 986.229 | 899  | 0.000351576 | down |
| serine-type endopeptidase inhibitor activity                                                                 | 46.5153 | 27   | 0.000636075 | down |
| epidermal cell differentiation                                                                               | 42.8568 | 25   | 0.00130131  | down |
| ribosome                                                                                                     | 97.2118 | 71   | 0.00166071  | down |
| response to stimulus                                                                                         | 1841.28 | 1745 | 0.00295325  | down |
| structural constituent of ribosome                                                                           | 78.3966 | 56   | 0.00329516  | down |
| serine-type endopeptidase activity                                                                           | 75.7834 | 54   | 0.00377863  | down |
| oxygen binding                                                                                               | 21.4284 | 10   | 0.00503966  | down |
| cytosolic ribosome                                                                                           | 38.153  | 23   | 0.00516021  | down |
| enzyme inhibitor activity                                                                                    | 138.501 | 112  | 0.0104862   | down |
| keratinocyte differentiation                                                                                 | 38.153  | 24   | 0.0104862   | down |
| translational elongation                                                                                     | 51.2191 | 35   | 0.0112348   | down |
| cysteine-type endopeptidase inhibitor activity                                                               | 18.8152 | 9    | 0.0126909   | down |
| ribosomal subunit                                                                                            | 60.1041 | 43   | 0.0141016   | down |
| endonuclease activity, active with either ribo- or deoxyribonucleic acids and producing 3'-phosphomonoesters | 11.4982 | 4    | 0.0163442   | down |
| microtubule-based flagellum                                                                                  | 12.5435 | 5    | 0.0225522   | down |
| serine hydrolase activity                                                                                    | 88.3269 | 69   | 0.0238064   | down |
| serine-type peptidase activity                                                                               | 86.7589 | 68   | 0.0280638   | down |
| ncRNA processing                                                                                             | 97.7344 | 78   | 0.0294516   | down |
| nucleosome                                                                                                   | 27.7001 | 17   | 0.029796    | down |
| large ribosomal subunit                                                                                      | 31.3586 | 20   | 0.0298087   | down |
| cytosolic large ribosomal subunit                                                                            | 18.8152 | 10   | 0.030974    | down |
| cytosolic part                                                                                               | 75.7834 | 59   | 0.037295    | down |
| cell-cell recognition                                                                                        | 8.88495 | 3    | 0.0416851   | down |
| DNA binding                                                                                                  | 1145.64 | 1088 | 0.0455873   | down |
| rRNA processing                                                                                              | 49.1285 | 36   | 0.0455873   | down |
| defense response to bacterium                                                                                | 55.9229 | 42   | 0.0464737   | down |
| aromatase activity                                                                                           | 11.4982 | 5    | 0.0474794   | down |
| MHC protein complex                                                                                          | 16.7246 | 9    | 0.049426    | down |
