# Supplementary material for: Characterizing 5-hydroxymethylcytosine in human prefrontal cortex at single base resolution
Source: PubMed Central journal article supplement (PMC4559220; doi:10.1186/s12864-015-1875-8), 2015-09-03
Supplement: 12864_2015_1875_MOESM8_ESM.pdf [file 12864_2015_1875_MOESM8_ESM.pdf]

**Supplementary Table S5 - Differential Gene Expression between males and females from Akula 2014**

| <b>Gene</b>   | <b>Ensembl ID</b> | <b>baseMean</b> | <b>log2FoldChange</b> | <b>p-value</b> | <b>Adjusted p-value</b> |
|---------------|-------------------|-----------------|-----------------------|----------------|-------------------------|
| XIST          | ENSG00000229807   | 27143.36991     | 2.461985605           | 7.95E-41       | 1.41E-37                |
| ZFX           | ENSG00000005889   | 2624.620477     | 0.653325343           | 6.60E-08       | 7.41E-05                |
| ENPP2         | ENSG00000136960   | 15757.83067     | 0.660906511           | 1.24E-05       | 0.011067117             |
| OTOF          | ENSG00000115155   | 328.8290401     | 0.652437267           | 5.26E-05       | 0.043171013             |
| P2RY13        | ENSG00000181631   | 379.5831507     | 0.728117741           | 7.21E-05       | 0.053046027             |
| RAB3B         | ENSG00000169213   | 6254.219996     | 0.467479666           | 0.00010749     | 0.076443359             |
| GPR78         | ENSG00000155269   | 37.47069932     | 0.688963595           | 0.000144745    | 0.099617065             |
| ANP32A        | ENSG00000140350   | 8694.593525     | 0.298110676           | 0.000173602    | 0.112236585             |
| CASR          | ENSG00000036828   | 15.02714533     | 0.593770968           | 0.000379131    | 0.23110759              |
| RP11-887P2.1  | NA                | 240.9953401     | 0.417055207           | 0.000455379    | 0.269875302             |
| TSPEAR-AS1    | NA                | 14.30414225     | 0.576199972           | 0.000620888    | 0.323088906             |
| DPYSL5        | ENSG00000157851   | 10506.37683     | 0.572657911           | 0.000649124    | 0.323726715             |
| P2RY12        | ENSG00000169313   | 1037.040065     | 0.610347192           | 0.000914919    | 0.368298098             |
| ZNF311        | NA                | 86.02362589     | 0.531919469           | 0.000949229    | 0.374938805             |
| ENPP6         | ENSG00000164303   | 1528.483458     | 0.551956906           | 0.001137008    | 0.4182424               |
| RP5-1086L22.1 | NA                | 7.626392227     | 0.547581362           | 0.001232039    | 0.441343141             |
| TLR7          | ENSG00000196664   | 153.0740006     | 0.593223329           | 0.00137614     | 0.458749028             |
| SCUBE1        | ENSG00000159307   | 154.5745393     | 0.570472418           | 0.001615427    | 0.486374754             |
| SNRPF         | ENSG00000139343   | 2813.099707     | 0.437070982           | 0.001641       | 0.486374754             |
| TLR10         | ENSG00000174123   | 133.2625248     | 0.58152872            | 0.001708958    | 0.486374754             |
| PDGFRA        | ENSG00000134853   | 3678.077454     | 0.514524031           | 0.001709778    | 0.486374754             |
| KLK5          | ENSG00000167754   | 279.2504958     | 0.521334798           | 0.002075901    | 0.558562712             |
| RP5-1142A6.2  | NA                | 51.9484078      | 0.502780507           | 0.002094447    | 0.558562712             |
| CHP2          | ENSG00000166869   | 37.78194704     | 0.56297248            | 0.002196848    | 0.57863901              |
| KRT78         | ENSG00000170423   | 15.42413528     | 0.520740054           | 0.00231392     | 0.594788978             |
| C21orf90      | NA                | 40.46686588     | 0.531837411           | 0.002446952    | 0.607330885             |
| DDX3X         | ENSG00000215301   | 22061.1329      | 0.309144083           | 0.002505044    | 0.607330885             |
| PNPLA4        | ENSG00000006757   | 1244.94564      | 0.342183814           | 0.00256818     | 0.607978826             |
| AC007620.3    | NA                | 581.0609945     | 0.369512939           | 0.002621704    | 0.607978826             |
| KDM6A         | ENSG00000147050   | 1955.385717     | 0.429192188           | 0.002675238    | 0.610155169             |
| ATAD3C        | ENSG00000215915   | 304.182738      | 0.527776476           | 0.002688286    | 0.610155169             |
| JPX           | ENSG00000225470   | 1840.28353      | 0.466073048           | 0.002876749    | 0.64605724              |
| PRAP1         | ENSG00000165828   | 32.38615068     | 0.543320268           | 0.003047306    | 0.662075851             |
| SAMD4A        | ENSG00000020577   | 3951.136295     | 0.27800941            | 0.00353087     | 0.724337689             |
| CTD-2224J9.2  | NA                | 505.1222983     | 0.482002857           | 0.003598383    | 0.73115706              |
| SLC17A8       | ENSG00000179520   | 178.3507783     | 0.433037873           | 0.003679348    | 0.740555507             |
| STK32B        | ENSG00000152953   | 330.924145      | 0.372103439           | 0.003835862    | 0.74796996              |
| BACE2         | ENSG00000182240   | 412.5463132     | 0.437281669           | 0.003857964    | 0.74796996              |
| RP5-1166H10.2 | NA                | 109.2080251     | 0.515898103           | 0.003884645    | 0.74796996              |
| GSTA1         | NA                | 51.33487349     | 0.45477709            | 0.003926536    | 0.74796996              |
| C2orf27B      | ENSG00000186825   | 1.882996047     | 0.326637124           | 0.004292509    | NA                      |
| ABP1          | NA                | 2.551134899     | 0.317358141           | 0.004345608    | NA                      |
| CTC-497E21.4  | NA                | 91.60312177     | 0.524812035           | 0.004485174    | 0.833870194             |
| YPEL2         | ENSG00000175155   | 7565.478143     | 0.329816679           | 0.004527984    | 0.833870194             |
| CYP24A1       | ENSG00000019186   | 130.7494167     | 0.471088755           | 0.004968264    | 0.872163305             |
| LINC00323     | ENSG00000226496   | 71.10712192     | 0.517004276           | 0.00506331     | 0.872163305             |

|              |                 |             |             |             |             |
|--------------|-----------------|-------------|-------------|-------------|-------------|
| TNIP3        | ENSG00000050730 | 129.1130568 | 0.503870629 | 0.005207316 | 0.872163305 |
| HN1L         | ENSG00000206053 | 1320.102785 | 0.500234746 | 0.005236107 | 0.872163305 |
| CD244        | ENSG00000122223 | 70.22415638 | 0.513257089 | 0.005488256 | 0.872163305 |
| KLK8         | ENSG00000129455 | 5.274137383 | 0.445704506 | 0.005638538 | 0.872163305 |
| RPLPOP2      | ENSG00000243742 | 324.0229044 | 0.461463885 | 0.005946932 | 0.901748041 |
| COL4A5       | ENSG00000188153 | 4463.436239 | 0.507970696 | 0.006145996 | 0.904978396 |
| ZNF833P      | ENSG00000197332 | 203.8243082 | 0.427033064 | 0.006150545 | 0.904978396 |
| SHISA2       | ENSG00000180730 | 118.8171545 | 0.497930487 | 0.006345424 | 0.919651571 |
| MBOAT1       | ENSG00000172197 | 157.0632312 | 0.498959763 | 0.006466571 | 0.919651571 |
| EPCAM        | ENSG00000119888 | 201.979206  | 0.504076732 | 0.006515873 | 0.919651571 |
| EHD4         | ENSG00000103966 | 698.3221135 | 0.31125339  | 0.006750332 | 0.928899261 |
| EXT1         | ENSG00000182197 | 2061.79168  | 0.266786429 | 0.006792045 | 0.928899261 |
| SPHKAP       | ENSG00000153820 | 4347.532055 | 0.414547441 | 0.007001526 | 0.946340411 |
| GBP3         | ENSG00000117226 | 222.9379592 | 0.4903279   | 0.007050603 | 0.946340411 |
| COX7A2       | ENSG00000112695 | 19312.3122  | 0.327014285 | 0.007148218 | 0.946512897 |
| AC103965.1   | NA              | 253.2491722 | 0.485268923 | 0.007187021 | 0.946512897 |
| CYBB         | NA              | 602.6553289 | 0.481054727 | 0.007471216 | 0.960779083 |
| ADAM28       | ENSG00000042980 | 555.4941457 | 0.471852217 | 0.00747372  | 0.960779083 |
| RAI14        | ENSG00000039560 | 913.8307518 | 0.453001328 | 0.007520302 | 0.960779083 |
| NXP4         | ENSG00000182379 | 289.3536686 | 0.461783708 | 0.007552951 | 0.960779083 |
| GPR34        | ENSG00000171659 | 268.5332522 | 0.487805906 | 0.00765561  | 0.960779083 |
| TMEM45A      | ENSG00000181458 | 95.21055753 | 0.489416065 | 0.007783202 | 0.971079609 |
| TBC1D3G      | NA              | 14.80089695 | 0.307112073 | 0.008378694 | 0.999970281 |
| MGC14436     | NA              | 119.4624808 | 0.470781559 | 0.008476919 | 0.999970281 |
| FABP6        | ENSG00000170231 | 601.1241518 | 0.419060241 | 0.00902496  | 0.999970281 |
| FIBCD1       | ENSG00000130720 | 233.2909234 | 0.481772544 | 0.009167895 | 0.999970281 |
| RMI2         | ENSG00000175643 | 176.0445379 | 0.458604405 | 0.009875507 | 0.999970281 |
| DIRAS2       | ENSG00000165023 | 43549.48356 | 0.36525519  | 0.010072913 | 0.999970281 |
| RP11-314A5.3 | NA              | 38.82107501 | 0.473962458 | 0.010088355 | 0.999970281 |
| MOBP         | ENSG00000168314 | 54302.8112  | 0.475546045 | 0.010237905 | 0.999970281 |
| CHCHD8       | NA              | 1792.738692 | 0.253931365 | 0.010453216 | 0.999970281 |
| ASPA         | ENSG00000108381 | 5579.44652  | 0.467710844 | 0.010513637 | 0.999970281 |
| RASGEF1B     | ENSG00000138670 | 1270.568081 | 0.382962515 | 0.011501871 | 0.999970281 |
| SSTR1        | ENSG00000139874 | 3722.091489 | 0.421644865 | 0.011785945 | 0.999970281 |
| TAC1         | ENSG00000006128 | 1354.943521 | 0.433381756 | 0.012018211 | 0.999970281 |
| AC108142.1   | NA              | 72.35026106 | 0.384849049 | 0.01202885  | 0.999970281 |
| LEMD1        | ENSG00000186007 | 12.99215195 | 0.45974813  | 0.012188842 | 0.999970281 |
| FCGR3A       | ENSG00000203747 | 388.0338332 | 0.462471022 | 0.012323914 | 0.999970281 |
| MYO16        | ENSG00000041515 | 1755.648947 | 0.324442072 | 0.01239075  | 0.999970281 |
| FOXP2        | ENSG00000128573 | 1964.626379 | 0.319798882 | 0.012439119 | 0.999970281 |
| XKR4         | ENSG00000206579 | 2159.209803 | 0.373520347 | 0.013144095 | 0.999970281 |
| PI16         | ENSG00000164530 | 687.8999627 | 0.456623688 | 0.013440402 | 0.999970281 |
| GREM1        | ENSG00000166923 | 2071.927535 | 0.456820235 | 0.013510201 | 0.999970281 |
| LGR5         | ENSG00000139292 | 557.5491631 | 0.456811917 | 0.013527025 | 0.999970281 |
| AC092296.2   | NA              | 48.34634408 | 0.40341115  | 0.013548667 | 0.999970281 |
| TEKT4        | NA              | 28.05043248 | 0.371903141 | 0.013805205 | 0.999970281 |
| FCGR2A       | ENSG00000143226 | 197.8950621 | 0.439302391 | 0.013920445 | 0.999970281 |
| CENPF        | ENSG00000117724 | 562.006452  | 0.414595286 | 0.014035096 | 0.999970281 |

|              |                 |             |             |             |             |
|--------------|-----------------|-------------|-------------|-------------|-------------|
| PDE7A        | ENSG00000205268 | 2098.097473 | 0.243787216 | 0.014193717 | 0.999970281 |
| PKP4         | ENSG00000144283 | 27996.46369 | 0.334403559 | 0.014275872 | 0.999970281 |
| GIPR         | ENSG00000010310 | 167.5928382 | 0.452763671 | 0.014335626 | 0.999970281 |
| DMRT2        | ENSG00000173253 | 128.7886921 | 0.438320792 | 0.01455467  | 0.999970281 |
| CPXM2        | ENSG00000121898 | 380.84824   | 0.389483648 | 0.014560155 | 0.999970281 |
| MTL5         | ENSG00000132749 | 115.539768  | 0.413528759 | 0.014584991 | 0.999970281 |
| GLRA2        | ENSG00000101958 | 682.7099273 | 0.332692767 | 0.014623718 | 0.999970281 |
| C12orf59     | NA              | 168.1940892 | 0.398516112 | 0.014737818 | 0.999970281 |
| FAM70A       | NA              | 418.5850398 | 0.339774421 | 0.014810142 | 0.999970281 |
| RP11-21A7A.3 | NA              | 9.072833102 | 0.390105409 | 0.014911372 | 0.999970281 |
| MMD          | ENSG00000108960 | 5139.716909 | 0.433503907 | 0.015097282 | 0.999970281 |
| IBSP         | ENSG00000029559 | 24.68826586 | 0.43289448  | 0.015290706 | 0.999970281 |
| GSN-AS1      | ENSG00000235865 | 873.7557598 | 0.442253538 | 0.015291488 | 0.999970281 |
| CD84         | ENSG00000066294 | 489.86526   | 0.444827824 | 0.015426934 | 0.999970281 |
| HHIPL2       | ENSG00000143512 | 28.52409226 | 0.43686176  | 0.015445026 | 0.999970281 |
| GRIK3        | ENSG00000163873 | 8251.878694 | 0.381133454 | 0.015734806 | 0.999970281 |
| PRR11        | ENSG00000068489 | 178.8168435 | 0.345087558 | 0.016000051 | 0.999970281 |
| KANK4        | ENSG00000132854 | 330.3352971 | 0.426322552 | 0.016005554 | 0.999970281 |
| NEUROG2      | ENSG00000178403 | 27.19273266 | 0.441913448 | 0.016587499 | 0.999970281 |
| RCAN3        | ENSG00000117602 | 257.5653685 | 0.425529238 | 0.016643753 | 0.999970281 |
| DMRTA2       | ENSG00000142700 | 32.94856935 | 0.387903814 | 0.016790693 | 0.999970281 |
| C8orf34      | ENSG00000165084 | 609.7438235 | 0.419907896 | 0.016823307 | 0.999970281 |
| CLN8         | ENSG00000182372 | 4674.282895 | 0.316197552 | 0.017176786 | 0.999970281 |
| HOXD-AS1     | NA              | 382.9381994 | 0.430819055 | 0.01723373  | 0.999970281 |
| GREM2        | ENSG00000180875 | 1668.582759 | 0.291292586 | 0.01729144  | 0.999970281 |
| ARHGEF37     | ENSG00000183111 | 3495.09336  | 0.353516495 | 0.01759431  | 0.999970281 |
| RPL7         | ENSG00000147604 | 1089.871539 | 0.431761322 | 0.017691857 | 0.999970281 |
| IGF2BP2      | ENSG00000073792 | 51.49904108 | 0.43508997  | 0.017903428 | 0.999970281 |
| SLITRK1      | ENSG00000178235 | 7978.732406 | 0.310611819 | 0.017947953 | 0.999970281 |
| POM121L2     | ENSG00000158553 | 13.088795   | 0.366643152 | 0.017989854 | 0.999970281 |
| BHMT         | ENSG00000145692 | 130.1717618 | 0.434587005 | 0.018378635 | 0.999970281 |
| COL25A1      | ENSG00000188517 | 453.6132206 | 0.371871108 | 0.018501816 | 0.999970281 |
| DNASE1       | ENSG00000213918 | 784.4462634 | 0.242103058 | 0.01856814  | 0.999970281 |
| UNC5C        | ENSG00000182168 | 4013.511838 | 0.345324931 | 0.018681341 | 0.999970281 |
| LHPP         | ENSG00000107902 | 5684.511378 | 0.397598987 | 0.018727057 | 0.999970281 |
| PIP          | ENSG00000159763 | 12.56977125 | 0.368216965 | 0.018764902 | 0.999970281 |
| IGSF10       | ENSG00000152580 | 199.8578745 | 0.400824807 | 0.018830976 | 0.999970281 |
| XIRP1        | ENSG00000168334 | 16.63763777 | 0.415061076 | 0.01895783  | 0.999970281 |
| CCDC167      | ENSG00000198937 | 770.9787873 | 0.306194541 | 0.019085228 | 0.999970281 |
| NTNG2        | ENSG00000196358 | 4708.288828 | 0.30663037  | 0.019285477 | 0.999970281 |
| snoU2-30     | NA              | 2.584470502 | 0.285456865 | 0.019346506 | NA          |
| FCGR2C       | ENSG00000244682 | 51.28538274 | 0.433360825 | 0.019405195 | 0.999970281 |
| PCDH9        | ENSG00000184226 | 34578.0301  | 0.251148267 | 0.019414595 | 0.999970281 |
| TMEM97       | NA              | 1505.795303 | 0.324562002 | 0.019438761 | 0.999970281 |
| DIXDC1       | NA              | 7554.21208  | 0.362941844 | 0.019450007 | 0.999970281 |
| NAV3         | ENSG00000067798 | 10630.42627 | 0.286002836 | 0.019584016 | 0.999970281 |
| FILIP1       | ENSG00000118407 | 1412.893991 | 0.374462636 | 0.019918342 | 0.999970281 |
| TBC1D3H      | NA              | 9.440892098 | 0.248788157 | 0.019979859 | 0.999970281 |

|               |                 |             |             |             |             |
|---------------|-----------------|-------------|-------------|-------------|-------------|
| SLITRK6       | ENSG00000184564 | 33.61402717 | 0.425360907 | 0.020328305 | 0.999970281 |
| AL096869.5    | NA              | 66.40469171 | 0.422793648 | 0.020950716 | 0.999970281 |
| HOXD1         | ENSG00000128645 | 130.4948279 | 0.406977559 | 0.020977684 | 0.999970281 |
| MMP2          | ENSG00000087245 | 325.3424402 | 0.381423198 | 0.021097289 | 0.999970281 |
| GRIK1         | ENSG00000171189 | 1867.878538 | 0.296386875 | 0.021362212 | 0.999970281 |
| ZBTB8A        | ENSG00000160062 | 43.95284612 | 0.425757401 | 0.021528273 | 0.999970281 |
| GPD1          | ENSG00000167588 | 1486.686451 | 0.403507856 | 0.021766889 | 0.999970281 |
| CRNDE         | ENSG00000245694 | 20.29118009 | 0.412761528 | 0.021774724 | 0.999970281 |
| TMEM98        | ENSG00000006042 | 2706.066605 | 0.405075223 | 0.021846526 | 0.999970281 |
| H2BFM         | NA              | 3.011646455 | 0.241502967 | 0.021895422 | 0.999970281 |
| SLN           | ENSG00000170290 | 184.7512155 | 0.421404613 | 0.021895734 | 0.999970281 |
| RP11-193H5.1  | NA              | 61.34622328 | 0.423263117 | 0.021964714 | 0.999970281 |
| IRS4          | ENSG00000133124 | 81.97953013 | 0.407097846 | 0.022112714 | 0.999970281 |
| RP11-467L20.9 | NA              | 138.1724021 | 0.423260147 | 0.022437351 | 0.999970281 |
| EPHB2         | ENSG00000133216 | 2177.498258 | 0.297571592 | 0.022450009 | 0.999970281 |
| GRIN3A        | ENSG00000198785 | 2732.068798 | 0.385100739 | 0.022521962 | 0.999970281 |
| SLC27A6       | ENSG00000113396 | 152.4074333 | 0.313626263 | 0.022669177 | 0.999970281 |
| RP3-455J7.4   | NA              | 24.07999165 | 0.421973761 | 0.022721406 | 0.999970281 |
| PCDHB16       | NA              | 370.5267705 | 0.338112719 | 0.022744055 | 0.999970281 |
| COL15A1       | ENSG00000204291 | 185.0754966 | 0.38307281  | 0.02289926  | 0.999970281 |
| SAMSN1        | ENSG00000155307 | 134.112993  | 0.416308217 | 0.022941608 | 0.999970281 |
| FGL2          | ENSG00000127951 | 409.6365257 | 0.393851511 | 0.023096245 | 0.999970281 |
| PRRT3-AS1     | ENSG00000230082 | 51.87743447 | 0.41416593  | 0.023443973 | 0.999970281 |
| TMEM215       | ENSG00000188133 | 87.77520355 | 0.402658814 | 0.023736369 | 0.999970281 |
| CABP5         | ENSG00000105507 | 5.395757084 | 0.334971137 | 0.023904235 | 0.999970281 |
| TMEM156       | ENSG00000121895 | 64.83975039 | 0.405011399 | 0.024176854 | 0.999970281 |
| MBP           | ENSG00000197971 | 633512.4152 | 0.414570311 | 0.02430358  | 0.999970281 |
| KDM5C         | NA              | 11692.15259 | 0.306035638 | 0.024475135 | 0.999970281 |
| TMEM37        | ENSG00000171227 | 45.96915032 | 0.416475588 | 0.024498629 | 0.999970281 |
| NDN           | ENSG00000182636 | 4158.36266  | 0.252602937 | 0.024563219 | 0.999970281 |
| GLT25D2       | NA              | 7616.067556 | 0.234160402 | 0.024603975 | 0.999970281 |
| CTGF          | ENSG00000118523 | 1442.118445 | 0.337334664 | 0.024725197 | 0.999970281 |
| KIR3DX1       | ENSG00000104970 | 16.21393964 | 0.416282504 | 0.024725348 | 0.999970281 |
| KCNJ5         | ENSG00000120457 | 140.8747311 | 0.403772576 | 0.024781955 | 0.999970281 |
| PCDHB8        | NA              | 127.7508599 | 0.415914161 | 0.024870589 | 0.999970281 |
| TRIM67        | ENSG00000119283 | 560.5520734 | 0.262639161 | 0.025051602 | 0.999970281 |
| C5orf64       | ENSG00000178722 | 276.1727136 | 0.377643205 | 0.025136377 | 0.999970281 |
| EDIL3         | ENSG00000164176 | 17005.16571 | 0.398620652 | 0.025199506 | 0.999970281 |
| HLA-DRB5      | ENSG00000198502 | 385.0887332 | 0.289065476 | 0.025417994 | 0.999970281 |
| CKAP2L        | ENSG00000169607 | 37.38356505 | 0.399746567 | 0.025500949 | 0.999970281 |
| CHN2          | ENSG00000106069 | 5008.493275 | 0.329660731 | 0.025548145 | 0.999970281 |
| HLA-P         | NA              | 35.87220681 | 0.387957521 | 0.025646842 | 0.999970281 |
| FAM19A4       | ENSG00000163377 | 231.118089  | 0.394426109 | 0.026056388 | 0.999970281 |
| CETP          | ENSG00000087237 | 62.40174401 | 0.406708785 | 0.026058407 | 0.999970281 |
| C9orf66       | ENSG00000183784 | 16.16615253 | 0.410645517 | 0.02616357  | 0.999970281 |
| CTC-281M20.1  | NA              | 12.15882489 | 0.40734193  | 0.026246273 | 0.999970281 |
| CYP26B1       | ENSG00000003137 | 3958.379538 | 0.347966566 | 0.026366057 | 0.999970281 |
| NOV           | ENSG00000136999 | 2469.440008 | 0.301819799 | 0.02636769  | 0.999970281 |

|              |                 |             |             |             |             |
|--------------|-----------------|-------------|-------------|-------------|-------------|
| AP000569.8   | NA              | 60.76573285 | 0.390234661 | 0.026600488 | 0.999970281 |
| SLC35F1      | ENSG00000196376 | 9916.755073 | 0.246263257 | 0.026794369 | 0.999970281 |
| CCR1         | ENSG00000163823 | 138.6515622 | 0.407799517 | 0.026936118 | 0.999970281 |
| AGA          | ENSG00000038002 | 966.5469856 | 0.342039646 | 0.027006192 | 0.999970281 |
| CTSL2        | NA              | 89.28879803 | 0.403516644 | 0.027061091 | 0.999970281 |
| SIGLEC11     | ENSG00000161640 | 33.54099239 | 0.395521876 | 0.027231979 | 0.999970281 |
| HDHD1        | ENSG00000130021 | 988.2469188 | 0.310522146 | 0.027394271 | 0.999970281 |
| MSH4         | ENSG00000057468 | 136.0080733 | 0.373238588 | 0.027479257 | 0.999970281 |
| DAPK2        | ENSG00000035664 | 1157.35162  | 0.38072221  | 0.027527085 | 0.999970281 |
| HMGCS1       | ENSG00000112972 | 16931.80249 | 0.320986944 | 0.0276357   | 0.999970281 |
| TMEM169      | ENSG00000163449 | 1263.920115 | 0.301575163 | 0.027808917 | 0.999970281 |
| KLRC2        | ENSG00000205809 | 49.187353   | 0.342259695 | 0.028207988 | 0.999970281 |
| SYT6         | ENSG00000134207 | 595.7161677 | 0.371954505 | 0.028282202 | 0.999970281 |
| ADAMTS9-AS1  | ENSG00000241158 | 33.14931726 | 0.403518039 | 0.028283267 | 0.999970281 |
| PDYN         | ENSG00000101327 | 443.0211677 | 0.403925275 | 0.028417264 | 0.999970281 |
| SQLE         | ENSG00000104549 | 3726.489848 | 0.372960285 | 0.028459344 | 0.999970281 |
| AQP7         | ENSG00000165269 | 130.204447  | 0.403972897 | 0.028738318 | 0.999970281 |
| LSM3         | ENSG00000170860 | 2580.52285  | 0.24092547  | 0.028815688 | 0.999970281 |
| AQP12B       | ENSG00000185176 | 12.84929819 | 0.379987427 | 0.029069722 | 0.999970281 |
| RP11-179G5.4 | NA              | 5190.482767 | 0.328424072 | 0.029252928 | 0.999970281 |
| C11orf24     | ENSG00000171067 | 1700.710281 | 0.2753737   | 0.029530224 | 0.999970281 |
| RIMS1        | ENSG00000079841 | 17990.37243 | 0.27838108  | 0.029764118 | 0.999970281 |
| SSH2         | ENSG00000141298 | 3961.584227 | 0.230040682 | 0.029791061 | 0.999970281 |
| PCDH20       | ENSG00000197991 | 2873.7579   | 0.325805813 | 0.029903488 | 0.999970281 |
| KCNK2        | ENSG00000082482 | 1068.357502 | 0.326598584 | 0.029974898 | 0.999970281 |
| CXorf21      | ENSG00000120280 | 45.7466877  | 0.399759363 | 0.030134494 | 0.999970281 |
| ISM1         | ENSG00000101230 | 163.4184749 | 0.339121569 | 0.03015423  | 0.999970281 |
| RP11-545I5.3 | NA              | 353.8197072 | 0.310410804 | 0.030372722 | 0.999970281 |
| CRHBP        | ENSG00000145708 | 1539.669535 | 0.359291025 | 0.031036855 | 0.999970281 |
| RASGRP3      | ENSG00000152689 | 2413.088906 | 0.383875814 | 0.031368579 | 0.999970281 |
| RPL36        | ENSG00000130255 | 12117.42584 | 0.34131079  | 0.03155205  | 0.999970281 |
| TNFSF15      | ENSG00000181634 | 11.22534256 | 0.394639093 | 0.031593985 | 0.999970281 |
| HLA-J        | NA              | 11.73312701 | 0.370846583 | 0.031648974 | 0.999970281 |
| CNTN6        | ENSG00000134115 | 1229.983069 | 0.3827003   | 0.031714348 | 0.999970281 |
| AC022148.1   | NA              | 218.9463694 | 0.381941141 | 0.031786494 | 0.999970281 |
| LIPA         | ENSG00000107798 | 6930.027509 | 0.375903563 | 0.031823258 | 0.999970281 |
| HMSD         | ENSG00000221887 | 90.23849671 | 0.39442074  | 0.031943109 | 0.999970281 |
| RP11-285F7.2 | NA              | 389.2742986 | 0.395609414 | 0.032364226 | 0.999970281 |
| NKAIN2       | ENSG00000188580 | 6348.817251 | 0.337842129 | 0.032373442 | 0.999970281 |
| GUCY1A3      | ENSG00000164116 | 4026.35955  | 0.305876428 | 0.032411962 | 0.999970281 |
| EPHA5        | ENSG00000145242 | 5427.823065 | 0.351424924 | 0.032487827 | 0.999970281 |
| RP5-872K7.7  | NA              | 3.985500932 | 0.30339687  | 0.032533003 | 0.999970281 |
| MKI67        | ENSG00000148773 | 38.50729458 | 0.383422375 | 0.032580964 | 0.999970281 |
| TGFA         | NA              | 1130.089223 | 0.390328194 | 0.032770446 | 0.999970281 |
| F13A1        | ENSG00000124491 | 562.8763945 | 0.331282756 | 0.033024233 | 0.999970281 |
| CEACAM21     | NA              | 33.33706289 | 0.393550964 | 0.033334207 | 0.999970281 |
| CTD-2269F5.1 | NA              | 94.16479981 | 0.357835716 | 0.033615872 | 0.999970281 |
| RP11-536K7.3 | NA              | 10.39950339 | 0.3560385   | 0.033809025 | 0.999970281 |

|               |                 |             |             |             |             |
|---------------|-----------------|-------------|-------------|-------------|-------------|
| VAX1          | ENSG00000148704 | 103.5116951 | 0.376867764 | 0.033827355 | 0.999970281 |
| CT45A5        | NA              | 2.019569092 | 0.255559312 | 0.033995374 | NA          |
| ROBO2         | ENSG00000185008 | 7409.083563 | 0.316686776 | 0.034273884 | 0.999970281 |
| AC003075.4    | NA              | 11.4800025  | 0.369887859 | 0.034336473 | 0.999970281 |
| RASGRP1       | ENSG00000172575 | 7377.985302 | 0.338197438 | 0.034358711 | 0.999970281 |
| ERAP2         | ENSG00000164308 | 667.2305118 | 0.392102181 | 0.034365313 | 0.999970281 |
| SLC9A2        | ENSG00000115616 | 233.3896507 | 0.365480703 | 0.034547884 | 0.999970281 |
| RP4-788L13.1  | NA              | 13939.8878  | 0.3414297   | 0.034561642 | 0.999970281 |
| GJC2          | ENSG00000198835 | 1006.90193  | 0.371615431 | 0.034565878 | 0.999970281 |
| TRAF3IP3      | ENSG00000009790 | 231.3423317 | 0.342366957 | 0.035675725 | 0.999970281 |
| FGD3          | ENSG00000127084 | 280.285024  | 0.331624373 | 0.035962702 | 0.999970281 |
| MCHR2         | ENSG00000152034 | 2120.96244  | 0.335465954 | 0.036170478 | 0.999970281 |
| ST8SIA2       | ENSG00000140557 | 167.7679199 | 0.38771355  | 0.036505045 | 0.999970281 |
| AC002055.4    | NA              | 1670.814504 | 0.255512773 | 0.036527681 | 0.999970281 |
| MIR25         | ENSG00000207547 | 2.515574342 | 0.266039231 | 0.036633854 | NA          |
| WNT16         | ENSG00000002745 | 141.9750752 | 0.323497042 | 0.036694139 | 0.999970281 |
| CYP1A1        | ENSG00000140465 | 114.3867413 | 0.362337687 | 0.036756745 | 0.999970281 |
| ERMN          | ENSG00000136541 | 25666.64865 | 0.386769825 | 0.036972087 | 0.999970281 |
| AC079135.1    | NA              | 7.08515741  | 0.333736171 | 0.037069627 | 0.999970281 |
| HTR2C         | NA              | 694.8344618 | 0.329249469 | 0.037109507 | 0.999970281 |
| FAM5C         | NA              | 2248.128573 | 0.256176679 | 0.037244194 | 0.999970281 |
| RP1-163M9.6   | NA              | 36.18959581 | 0.384248064 | 0.037333724 | 0.999970281 |
| NMU           | ENSG00000109255 | 43.87128491 | 0.385399904 | 0.037640454 | 0.999970281 |
| MPEG1         | ENSG00000197629 | 224.2188352 | 0.38044311  | 0.037666328 | 0.999970281 |
| AIF1          | NA              | 420.2525645 | 0.380828018 | 0.038080937 | 0.999970281 |
| RAB3C         | ENSG00000152932 | 31980.07718 | 0.326949952 | 0.038223033 | 0.999970281 |
| LRP2          | ENSG00000081479 | 3832.902931 | 0.383795132 | 0.038375494 | 0.999970281 |
| ACCSL         | ENSG00000205126 | 3.88912116  | 0.287429484 | 0.038514911 | 0.999970281 |
| RGPD5         | NA              | 246.3905301 | 0.382963564 | 0.038765952 | 0.999970281 |
| RP11-111E14.1 | NA              | 96.8222492  | 0.374020471 | 0.039174577 | 0.999970281 |
| TSPAN11       | ENSG00000110900 | 694.6881622 | 0.341559814 | 0.039385934 | 0.999970281 |
| EPM2A         | ENSG00000112425 | 1657.36637  | 0.214297118 | 0.039408479 | 0.999970281 |
| C2orf89       | NA              | 1542.29035  | 0.306400995 | 0.039481855 | 0.999970281 |
| PLEK          | ENSG00000115956 | 218.3481865 | 0.353330776 | 0.039513678 | 0.999970281 |
| BFSP1         | ENSG00000125864 | 367.1978505 | 0.27875024  | 0.039967323 | 0.999970281 |
| C1QA          | ENSG00000173372 | 619.3769413 | 0.3804454   | 0.0400365   | 0.999970281 |
| SYNJ2-IT1     | ENSG00000233496 | 10.17928215 | 0.369288894 | 0.040279996 | 0.999970281 |
| ANLN          | ENSG00000011426 | 9059.705508 | 0.379046704 | 0.040300765 | 0.999970281 |
| PELI1         | ENSG00000197329 | 1756.499633 | 0.284565601 | 0.040304448 | 0.999970281 |
| PHF16         | NA              | 558.3845014 | 0.338953659 | 0.040365243 | 0.999970281 |
| IL21R         | ENSG00000103522 | 118.8808944 | 0.372122371 | 0.040498209 | 0.999970281 |
| PLP1          | ENSG00000123560 | 259744.6508 | 0.379027058 | 0.040585709 | 0.999970281 |
| SIGLEC10      | ENSG00000142512 | 166.5824465 | 0.378219095 | 0.040634674 | 0.999970281 |
| CCR6          | NA              | 144.1019168 | 0.276500751 | 0.040680827 | 0.999970281 |
| ZSCAN29       | ENSG00000140265 | 2477.04515  | 0.230104647 | 0.040807506 | 0.999970281 |
| ASAH1         | ENSG00000104763 | 9323.558292 | 0.186474892 | 0.040834943 | 0.999970281 |
| LANCL1        | ENSG00000115365 | 29038.42095 | 0.29070757  | 0.041004769 | 0.999970281 |
| GABRA5        | ENSG00000186297 | 10371.86127 | 0.291814612 | 0.041314108 | 0.999970281 |

|               |                 |             |             |             |             |
|---------------|-----------------|-------------|-------------|-------------|-------------|
| ODZ3          | NA              | 7168.051385 | 0.295809866 | 0.041326806 | 0.999970281 |
| PLAC2         | NA              | 807.0586095 | 0.329369004 | 0.041377789 | 0.999970281 |
| ZMIZ1         | ENSG00000108175 | 13284.71642 | 0.197870847 | 0.041480758 | 0.999970281 |
| SDK2          | ENSG00000069188 | 2463.095507 | 0.253830905 | 0.041504871 | 0.999970281 |
| TMEM199       | NA              | 1137.366317 | 0.196292068 | 0.041531315 | 0.999970281 |
| INSIG1        | ENSG00000186480 | 4770.216435 | 0.322716755 | 0.041551687 | 0.999970281 |
| C1orf95       | ENSG00000203685 | 19657.62644 | 0.340770259 | 0.041641246 | 0.999970281 |
| LINC00471     | ENSG00000181798 | 144.3341778 | 0.362213115 | 0.041662686 | 0.999970281 |
| BCHE          | ENSG00000114200 | 502.445992  | 0.368769956 | 0.04176271  | 0.999970281 |
| AC092667.2    | NA              | 61.32109046 | 0.372018964 | 0.042010919 | 0.999970281 |
| C8orf51       | NA              | 57.67528725 | 0.332595517 | 0.042346846 | 0.999970281 |
| LDB3          | ENSG00000122367 | 3460.540872 | 0.365707944 | 0.042367496 | 0.999970281 |
| ZNF595        | ENSG00000272602 | 249.4878432 | 0.370986539 | 0.042501826 | 0.999970281 |
| CEACAM7       | NA              | 2.464892448 | 0.207711567 | 0.042552336 | NA          |
| SPRN          | ENSG00000203772 | 4117.227723 | 0.297515244 | 0.042761923 | 0.999970281 |
| C6orf141      | ENSG00000197261 | 182.4310378 | 0.374898025 | 0.042837024 | 0.999970281 |
| GCNT1         | ENSG00000187210 | 680.5751148 | 0.292343192 | 0.042946697 | 0.999970281 |
| FGF1          | ENSG00000113578 | 14239.0475  | 0.333591202 | 0.042971044 | 0.999970281 |
| SLC25A13      | ENSG00000004864 | 1073.026286 | 0.347477074 | 0.043209682 | 0.999970281 |
| TFRC          | ENSG00000072274 | 7247.918297 | 0.344423674 | 0.043219346 | 0.999970281 |
| COX10-AS1     | ENSG00000236088 | 385.7919653 | 0.228651228 | 0.043264559 | 0.999970281 |
| TNFSF14       | ENSG00000125735 | 6.242554276 | 0.326962953 | 0.043423167 | 0.999970281 |
| LANCL2        | ENSG00000132434 | 8258.321063 | 0.224571241 | 0.043522325 | 0.999970281 |
| GALNTL6       | ENSG00000174473 | 801.8287348 | 0.30350985  | 0.043607793 | 0.999970281 |
| RP5-1043L13.1 | NA              | 94.69202743 | 0.372512569 | 0.043644196 | 0.999970281 |
| HCG4P3        | NA              | 16.71254646 | 0.346014491 | 0.043710949 | 0.999970281 |
| TUBA3E        | ENSG00000152086 | 18.92243319 | 0.36056947  | 0.043833944 | 0.999970281 |
| C15orf37      | NA              | 53.49249619 | 0.316618369 | 0.044426245 | 0.999970281 |
| ADAMTS12      | ENSG00000151388 | 41.45747855 | 0.353410607 | 0.044474333 | 0.999970281 |
| RP11-959I15.3 | NA              | 45.30096989 | 0.359506691 | 0.04455038  | 0.999970281 |
| SLC24A1       | ENSG00000074621 | 958.8777129 | 0.157278769 | 0.044569604 | 0.999970281 |
| ZEB2-AS1      | ENSG00000238057 | 11.86829852 | 0.352627236 | 0.044586231 | 0.999970281 |
| NPPA          | ENSG00000175206 | 133.916615  | 0.362427828 | 0.044815205 | 0.999970281 |
| LYVE1         | ENSG00000133800 | 337.490123  | 0.344462086 | 0.044908153 | 0.999970281 |
| OLR1          | ENSG00000173391 | 517.310571  | 0.360695775 | 0.044958616 | 0.999970281 |
| SEMA3E        | ENSG00000170381 | 1821.537633 | 0.356129623 | 0.045032577 | 0.999970281 |
| POC1A         | ENSG00000164087 | 287.0389294 | 0.318402898 | 0.045180971 | 0.999970281 |
| MXRA5         | ENSG00000101825 | 255.553269  | 0.367040389 | 0.04551957  | 0.999970281 |
| TMEM200A      | ENSG00000164484 | 801.0070607 | 0.32876024  | 0.045677079 | 0.999970281 |
| AC010894.5    | NA              | 6.323511611 | 0.336058073 | 0.045880995 | 0.999970281 |
| SOX2-OT       | ENSG00000242808 | 15882.31463 | 0.369611683 | 0.045981992 | 0.999970281 |
| WNK1          | ENSG00000060237 | 42238.86004 | 0.260561655 | 0.046114168 | 0.999970281 |
| FUT9          | ENSG00000172461 | 448.2951848 | 0.369614754 | 0.04618895  | 0.999970281 |
| TLL1          | ENSG00000038295 | 303.5099765 | 0.266302624 | 0.046494467 | 0.999970281 |
| TFEC          | ENSG00000105967 | 93.37121206 | 0.368072701 | 0.04710687  | 0.999970281 |
| BVES          | ENSG00000112276 | 685.829484  | 0.3388693   | 0.047412399 | 0.999970281 |
| PHGR1         | ENSG00000233041 | 1.78193764  | 0.237896932 | 0.047508906 | NA          |
| RGS10         | ENSG00000148908 | 382.3929018 | 0.364424218 | 0.047581371 | 0.999970281 |

|          |                 |             |             |             |             |
|----------|-----------------|-------------|-------------|-------------|-------------|
| NLGN4X   | ENSG00000146938 | 5818.581161 | 0.304831281 | 0.047837674 | 0.999970281 |
| NKX6-1   | ENSG00000163623 | 21.59863819 | 0.366406895 | 0.047870755 | 0.999970281 |
| SFRP1    | ENSG00000104332 | 1724.768893 | 0.330870096 | 0.047984475 | 0.999970281 |
| ABCA8    | ENSG00000141338 | 4300.716462 | 0.366629077 | 0.047991089 | 0.999970281 |
| CCDC109B | ENSG00000005059 | 256.8957128 | 0.314674721 | 0.048073424 | 0.999970281 |
| KRT6C    | ENSG00000170465 | 1.688316378 | 0.155329505 | 0.048187667 | NA          |
| TRIM59   | ENSG00000213186 | 626.3486331 | 0.364751548 | 0.048247007 | 0.999970281 |
| NINJ2    | ENSG00000171840 | 528.6345046 | 0.359059814 | 0.048471019 | 0.999970281 |
| ZNF26    | NA              | 2.96936002  | 0.203586553 | 0.04857669  | 0.999970281 |
| EPHA7    | ENSG00000135333 | 1964.091827 | 0.262716314 | 0.04870352  | 0.999970281 |
| SGMS2    | ENSG00000164023 | 583.9365667 | 0.317478603 | 0.048800196 | 0.999970281 |
| NPY      | ENSG00000122585 | 2064.804873 | 0.359956983 | 0.048809022 | 0.999970281 |
| PCDHAC1  | NA              | 405.8505941 | 0.305896204 | 0.048848782 | 0.999970281 |
| KCNQ1OT1 | ENSG00000269821 | 2481.587161 | 0.334207502 | 0.049334452 | 0.999970281 |
| SLC35D2  | ENSG00000130958 | 636.2619788 | 0.356494043 | 0.049384007 | 0.999970281 |
| TP53INP2 | ENSG00000078804 | 21244.73976 | 0.343661961 | 0.049391877 | 0.999970281 |
| BACE1    | ENSG00000186318 | 16277.2865  | 0.254363961 | 0.049559256 | 0.999970281 |
